# Supplementary material for: Brønsted acid-promoted ring-opening and annulation of thioamides and 2H-azirines to synthesize 2,4,5-trisubstituted thiazoles
Source: Royal Society of Chemistry journal article supplement (doi:10.1039/d3ob00245d), 2023-01-01

## Supporting Information

# Brønsted Acid-Promoted Ring-opening and Annulation of 2,3-Diaryl-2*H*-azirines and Thiobenzamide to Synthesize 2,4,5-Trisubstituted Thiazoles.

Meng Wang<sup>a</sup>, Jingyi Ma<sup>a</sup>, Hesong Wang<sup>a</sup>, Fangpeng Hu<sup>a</sup>, Bo Sun<sup>a</sup>, Taiyan Tan<sup>a</sup>, Minglang Li<sup>a</sup> and Guosheng Huang<sup>\*a</sup>

<sup>a</sup>State Key Laboratory of Applied Organic Chemistry, Key Laboratory of Nonferrous Metal Chemistry and Resources Utilization of Gansu Province, Department of Chemistry, Lanzhou University, Lanzhou 730000, China.

Fax: 86-931-8912596; E-mail: hgs@lzu.edu.cn

## Table of contents

|                                                                     |    |
|---------------------------------------------------------------------|----|
| 1. General information -----                                        | S2 |
| 2. Experimental section -----                                       | S2 |
| 2.1 General procedure for the synthesis of <b>1e,1k,1m,1n</b> ----- | S2 |
| 2.2 General procedure for the synthesis of <b>2b-2k</b> -----       | S3 |
| 2.3 General procedure for the synthesis of product <b>3</b> -----   | S7 |
| 2.4 Trace the nitrogen atom -----                                   | S7 |
| 2.5 Mechanism study -----                                           | S7 |
| 2.6 Gram-scale reaction -----                                       | S8 |
| 3. Characterization data of products -----                          | S9 |

## 1. General information

$^1\text{H}$  NMR, and  $^{13}\text{C}$  NMR spectra were recorded on Mercury 400M in DMSO- $d_6$ . All  $^1\text{H}$  NMR and  $^{13}\text{C}$  NMR chemical shifts were given as  $\delta$  value (ppm) with reference to tetramethylsilane (TMS) as an internal standard. Copies of their  $^1\text{H}$  NMR and  $^{13}\text{C}$  NMR spectra were provided. Products were purified by flash chromatography on 200–300 mesh silica gels. All reactions were carried out in oven-dried glassware, unless otherwise noted. Unless otherwise noted, all reagents were obtained from commercial suppliers and used without further purification.

## 2. Experimental section

### 2.1 General procedure for the synthesis of 1k,1m,1n.

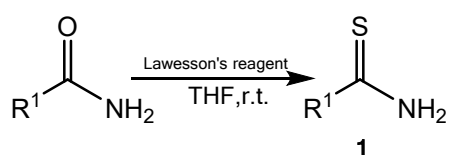

Substrates **1** were prepared according to reported method.<sup>1</sup> Add corresponding amide (10 mmol) and Lawesson's reagent (4.9 g, 12 mmol) to dry THF (150 mL). Stir the reaction mixture over night. Evaporate the solvent under reduced pressure. Add EtOAc (100 mL) and saturated  $\text{NaHCO}_3$  (100 mL, aq) to the mixture. Combined organic phase was washed with saturated  $\text{NaCl}$  (aq) and dried over  $\text{Na}_2\text{SO}_4$ . Purify the crude product further by silica gel flash chromatography, using hexane/EtOAc, to obtain thiobenzamide **1**.

### 4-bromobenzothioamide (1k)

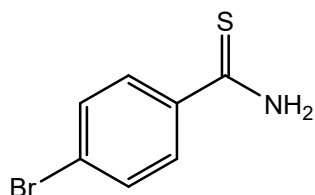

yellow solid.

$^1\text{H}$  NMR (400 MHz, DMSO- $d_6$ ):  $\delta$  9.93 (s, 1H), 9.55 (s, 1H), 7.82 (d,  $J$  = 8.5 Hz, 2H), 7.63 - 7.61 (m, 2H).

$^{13}\text{C}$  NMR (101 MHz, DMSO- $d_6$ ):  $\delta$  204.01, 143.73, 136.07, 134.55, 134.49, 130.17.

### [1,1'-biphenyl]-4-carbothioamide (1m)

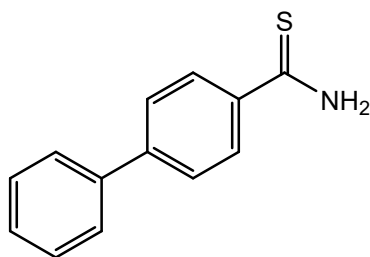

yellow solid.

$^1\text{H NMR}$  (400 MHz, DMSO- $d_6$ ):  $\delta$  9.90 (s, 1H), 9.55 (s, 1H), 8.02 (d,  $J = 8.4$  Hz, 2H), 7.73 (d,  $J = 8.3$  Hz, 4H), 7.50 (t,  $J = 7.6$  Hz, 2H), 7.41 (t,  $J = 7.3$  Hz, 1H).

$^{13}\text{C NMR}$  (101 MHz, DMSO- $d_6$ ):  $\delta$  199.86, 143.14, 139.51, 138.55, 129.51, 128.57, 128.51, 127.29, 126.56.

### naphthalene-2-carbothioamide (1n)

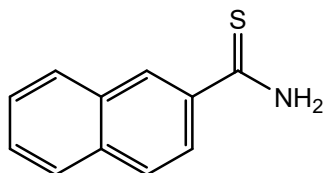

yellow solid.

$^1\text{H NMR}$  (400 MHz, DMSO- $d_6$ ):  $\delta$  9.99 (s, 1H), 9.67 (s, 1H), 8.45 (d,  $J = 1.3$  Hz, 1H), 8.06-8.01 (m, 2H), 7.97-7.93 (m, 2H), 7.65-7.54 (m, 2H).

$^{13}\text{C NMR}$  (101 MHz, DMSO- $d_6$ ):  $\delta$  200.52, 137.22, 134.47, 132.28, 129.57, 128.17, 128.01, 127.80, 127.31, 127.11, 125.57.

## 2.2 General procedure for the synthesis of 2a-2m.

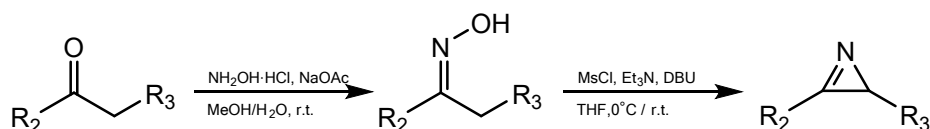

Substrates **2** were prepared according to reported method.<sup>2</sup> A solution of ketone (1 eq),  $\text{NH}_2\text{OH}\cdot\text{HCl}$  (1.5 eq) and sodium acetate (1.5 eq) in a mixture solvent of MeOH/ $\text{H}_2\text{O}$  (20:1) was stirred at room temperature. When the reaction completed (indicated by TLC), the solvent was removed in vacuo and extracted by DCM. The combined organic phase was washed with sat.  $\text{NaHCO}_3(\text{aq.})$ , brine sequentially, and then dried over anhydrous  $\text{Na}_2\text{SO}_4$ . After removing the solvent, the crude oxime was used directly for the next step.

To a solution of the crude oxime (1 eq) in dry THF was added triethylamine (1.5 eq) and methanesulfonyl chloride (1.5 eq) sequentially at room temperature or  $0^\circ\text{C}$ . The solution got cloudy after the addition of methanesulfonyl chloride. The resulting mixture was stirred for 30 min, and DBU (1.5 eq) was then added over 10 min. After stirred for additional 30 min, the reaction mixture was passed through a pad of silica gel, washing with EtOAc. The mixture was concentrated in vacuo and the resulting residue was purified by column chromatography on silica gel to give the 2H-azirine.

### 3-(4-ethylphenyl)-2-phenyl-2H-azirine (2d)

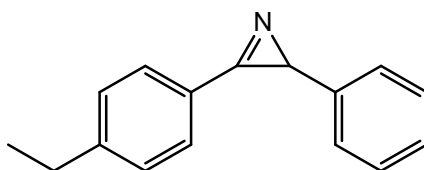

Colorless oil.

$^1\text{H NMR}$  (400 MHz,  $\text{CDCl}_3$ ):  $\delta$  7.82 (d,  $J = 8.0$  Hz, 2H), 7.37 (d,  $J = 8.0$  Hz, 2H), 7.27-7.22 (m, 3H), 7.15 (d,  $J = 6.8$  Hz, 2H), 3.29 (s, 1H), 2.74 (q,  $J = 7.6$  Hz, 2H), 1.28 (t,  $J = 7.6$  Hz, 3H).

$^{13}\text{C NMR}$  (101 MHz,  $\text{CDCl}_3$ ):  $\delta$  162.9, 150.2, 141.0, 130.0, 128.8, 128.2, 126.9, 126.0, 121.4, 34.2, 29.1, 15.2.

**HRMS (ESI)** calcd for  $\text{C}_{16}\text{H}_{15}\text{NH}^+$ :  $[\text{M}+\text{H}]^+$  222.1277, found: 222.1275.

### 3-(2,5-dimethylphenyl)-2-phenyl-2*H*-azirine (2e)

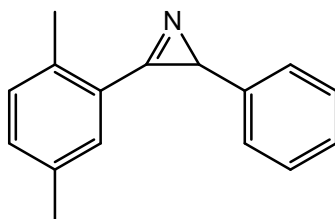

Colorless oil.

$^1\text{H NMR}$  (400 MHz,  $\text{CDCl}_3$ ):  $\delta$  7.52 (s, 1H), 7.30-7.23 (m, 5H), 7.14 (d,  $J = 7.6$  Hz, 2H), 3.20 (s, 1H), 2.64 (s, 3H), 2.34 (s, 3H).

$^{13}\text{C NMR}$  (101 MHz,  $\text{CDCl}_3$ ):  $\delta$  162.5, 141.4, 138.1, 135.9, 133.6, 132.1, 130.9, 128.2, 126.8, 125.9, 122.1, 32.7, 20.6, 19.4.

**HRMS (ESI)** calcd for  $\text{C}_{16}\text{H}_{15}\text{NH}^+$ :  $[\text{M}+\text{H}]^+$  222.1277, found: 222.1273.

### 3-benzyl-2-phenyl-2*H*-azirine (2f)

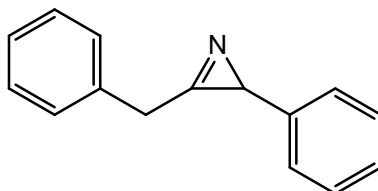

Yellow oil.

$^1\text{H NMR}$  (400 MHz,  $\text{CDCl}_3$ ):  $\delta$  7.37-7.22 (m, 8H), 7.05-7.03 (m, 2H), 4.17 (dd,  $J_1 = 35.2$  Hz,  $J_2 = 17.2$  Hz, 2H), 2.98 (s, 1H).

$^{13}\text{C NMR}$  (101 MHz,  $\text{CDCl}_3$ ):  $\delta$  166.6, 140.9, 132.7, 129.0, 128.9, 128.2, 127.5, 126.9, 125.7, 34.1, 33.4.

**HRMS (ESI)** calcd for  $\text{C}_{15}\text{H}_{13}\text{NH}^+$ :  $[\text{M}+\text{H}]^+$  208.1121, found: 208.1120.

### 3-(naphthalen-2-yl)-2-phenyl-2*H*-azirine (2g)

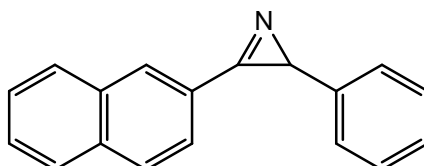

White solid.

**<sup>1</sup>H NMR** (400 MHz, CDCl<sub>3</sub>): δ 8.29 (s, 1H), 8.05 (d, J= 8.4 Hz, 1H), 8.00 (d, J= 8.4 Hz, 1H), 7.90 (d, J= 8.0 Hz, 2H), 7.61 (t, J= 7.2 Hz, 1H), 7.55 (t, J= 7.6 Hz, 1H), 7.30-7.24 (m, 3H), 7.21-7.19 (m, 2H), 3.41 (s, 1H).

**<sup>13</sup>C NMR** (101 MHz, CDCl<sub>3</sub>): δ 163.4, 140.8, 135.5, 132.8, 132.1, 129.3, 129.0, 128.6, 128.3, 128.0, 127.1, 127.1, 126.1, 124.5, 121.3, 34.6.

**HRMS (ESI)** calcd for C<sub>18</sub>H<sub>13</sub>NH<sup>+</sup>: [M+H]<sup>+</sup> 244.1121, found: 244.1123.

### 3-(4-fluorophenyl)-2-phenyl-2H-azirine (2h)

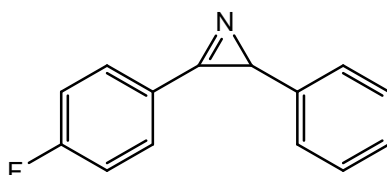

Colorless oil.

**<sup>1</sup>H NMR** (400 MHz, CDCl<sub>3</sub>): δ 7.92 (dd, J= 5.6, 8.8 Hz, 2H), 7.30-7.22 (m, 5H), 7.14 (dd, J= 1.6, 8.0 Hz, 2H), 3.33 (s, 1H).

**<sup>13</sup>C NMR** (101 MHz, CDCl<sub>3</sub>): δ 166.91, 164.37, 162.51, 140.64, 132.31, 132.21, 128.38, 127.23, 126.11, 116.90, 116.68, 34.60.

**HRMS (ESI)** calcd for C<sub>14</sub>H<sub>10</sub>FNH<sup>+</sup>: [M+H]<sup>+</sup> 212.0870, found: 212.0869.

### 3-(4-chlorophenyl)-2-phenyl-2H-azirine (2i)

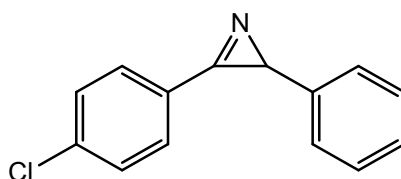

Yellow oil.

**<sup>1</sup>H NMR** (400 MHz, CDCl<sub>3</sub>): δ 7.75 (d, J = 8.4 Hz, 2H) , 7.44 (d, J = 8.4 Hz, 2H) , 7.22-7.14 (m, 3H) , 7.06-7.04 (m, 2H) , 3.25 (s, 1H).

**<sup>13</sup>C NMR** (101 MHz, CDCl<sub>3</sub>): δ 162.8, 140.4, 139.5, 131.0, 129.7, 128.3, 127.2, 126.0, 122.6, 34.6.

**HRMS (ESI)** calcd for C<sub>14</sub>H<sub>10</sub>ClNH<sup>+</sup>: [M+H]<sup>+</sup> 228.0575, found: 228.0573.

### 3-(4-bromophenyl)-2-phenyl-2H-azirine (2j)

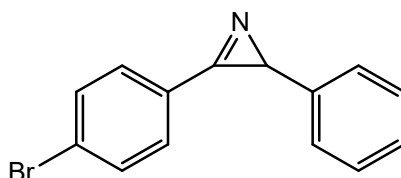

Colorless oil

**<sup>1</sup>H NMR** (400 MHz, CDCl<sub>3</sub>): δ 7.77 (d, J= 8.0 Hz, 2H), 7.70 (d, J= 8.0 Hz, 2H), 7.29-7.25 (m, 3H), 7.13 (d, J= 7.2 Hz, 2H), 3.34 (s, 1H).

**<sup>13</sup>C NMR** (101 MHz, CDCl<sub>3</sub>): δ 163.0, 140.3, 132.7, 131.1, 128.3, 128.1, 127.2, 126.0, 122.9, 34.6.

**HRMS (ESI)** calcd for  $C_{14}H_{10}BrNH^+$ :  $[M+H]^+$  272.0069, found: 272.0067.

**3-(4-methoxyphenyl)-2-phenyl-2H-azirine (2k)**

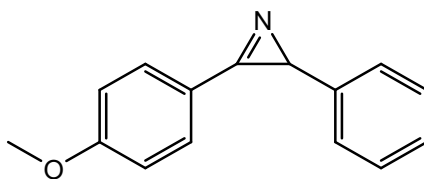

Colorless oil

**$^1H$  NMR** (400 MHz,  $CDCl_3$ ):  $\delta$  7.85 (d,  $J$ = 8.8 Hz, 2H), 7.27-7.22 (m, 3H), 7.15-7.13 (m, 2H), 7.04 (d,  $J$ = 8.4 Hz, 2H), 3.88 (s, 3H), 3.27 (s, 1H).

**$^{13}C$  NMR** (101 MHz,  $CDCl_3$ ):  $\delta$  163.4, 162.0, 141.2, 131.8, 128.2, 126.8, 126.0, 116.3, 114.7, 55.5, 34.0.

**HRMS (ESI)** calcd for  $C_{15}H_{13}NOH^+$ :  $[M+H]^+$  224.1070, found: 224.1072.

**3-phenyl-2-(p-tolyl)-2H-azirine (2l)**

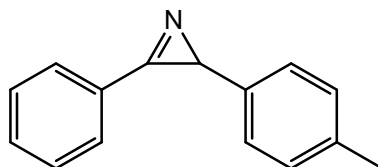

Colorless oil

**$^1H$  NMR** (400 MHz,  $CDCl_3$ ):  $\delta$  7.91-7.88 (m, 2H), 7.59-7.51 (m, 3H), 7.10-7.03 (m, 4H), 3.30 (s, 1H), 2.31 (s, 3H).

**$^{13}C$  NMR** (101 MHz,  $CDCl_3$ ):  $\delta$  163.7, 137.8, 136.7, 133.0, 129.8, 129.2, 128.9, 126.0, 124.2, 34.3, 21.1.

**HRMS (ESI)** calcd for  $C_{15}H_{13}NH^+$ :  $[M+H]^+$  208.1121, found: 208.1119.

**2-(4-chlorophenyl)-3-phenyl-2H-azirine (2m)**

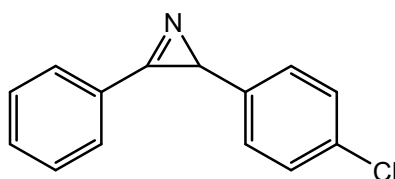

Colorless oil

**$^1H$  NMR** (400 MHz,  $CDCl_3$ ):  $\delta$  7.88 (d,  $J$ = 6.8 Hz, 2H), 7.61-7.53 (m, 3H), 7.24 (d,  $J$ = 8.0 Hz, 2H), 7.07 (d,  $J$ = 8.0 Hz, 2H), 3.29 (s, 1H).

**$^{13}C$  NMR** (101 MHz,  $CDCl_3$ ):  $\delta$  163.2, 139.4, 133.3, 132.7, 129.9, 129.3, 128.4, 127.3, 123.6, 33.7.

**HRMS (ESI)** calcd for  $C_{14}H_{10}ClNH^+$ :  $[M+H]^+$  228.0575, found: 228.0572.

### 2.3 General procedure for the synthesis of product 3

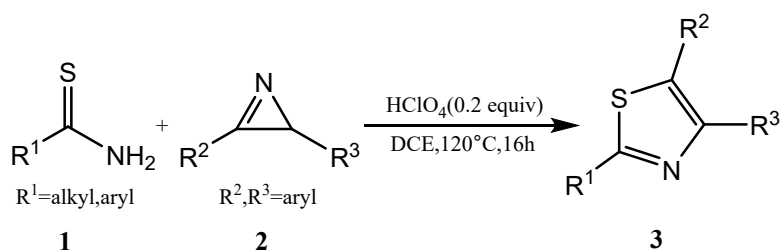

To a 15 mL sealed tube containing a magnetic stir bar were added thioamide (**1**, 0.3 mmol, 1.5 equiv.), 2H-azirine (**2**, 0.2 mmol, 1.0 equiv.).  $\text{HClO}_4$  (2.3  $\mu\text{L}$ , 0.04 mmol, 0.2 equiv.) was washed down by 1,2-dichloroethane (DCE, 2.0 mL) and the substrates were dissolved. After stirred for 16 h at  $120^\circ\text{C}$ , the mixture was concentrated under reduced pressure and purified by silica gel column chromatography (eluent: petroleum ether/ethyl acetate (v/v) = 100:1) to afford product **3**.

### 2.4 Trace the nitrogen atom.

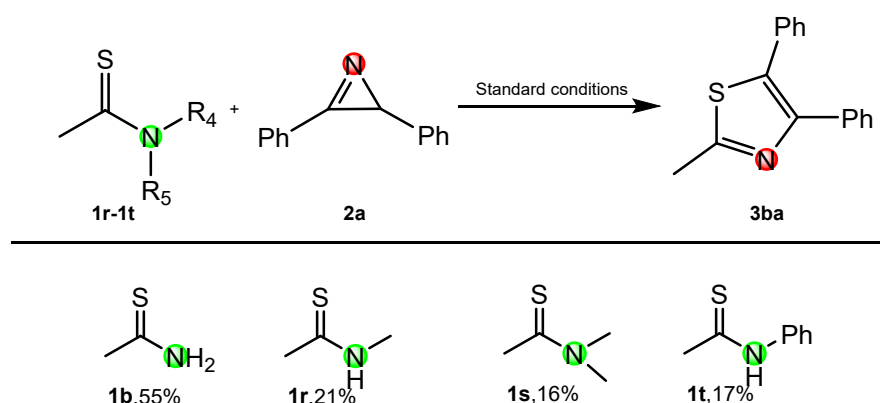

Under the standard conditions, add **2a** (0.2 mmol) and different thioamide **1r-1t** (0.3 mmol) to DCE (2mL). After the reaction, we got the same trithiazole as **3ba**, while there weren't new products.

### 2.5 Mechanism study

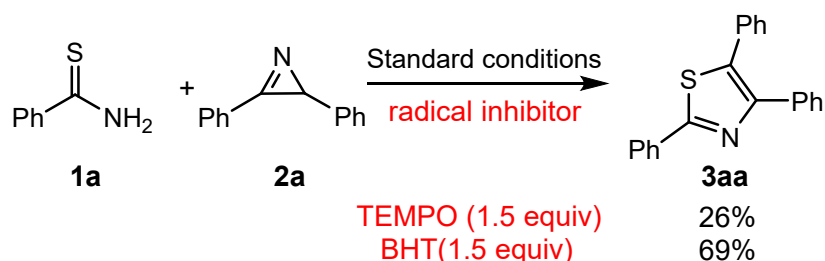

To a 15 mL sealed tube containing a magnetic stir bar were added benzothioamide (**1a**, 0.3 mmol, 1.5 equiv.), 2,3-diphenyl-2H-azirine (**2a**, 0.2 mmol, 1.0 equiv.), radical inhibitor (1.5 equiv.).  $\text{HClO}_4$  (2.3  $\mu\text{L}$ , 0.04 mmol, 0.2 equiv.) was washed down by 1,2-dichloroethane (DCE, 2.0 mL) and the substrates were dissolved. After stirred for 16 h

at 120 °C, the mixture was concentrated under reduced pressure and purified by silica gel column chromatography (eluent: petroleum ether/ethyl acetate (v/v) = 100:1) to afford product **3aa**. The products were obtained with yields of 26% and 69% respectively.

## 2.6 Gram-scale reaction

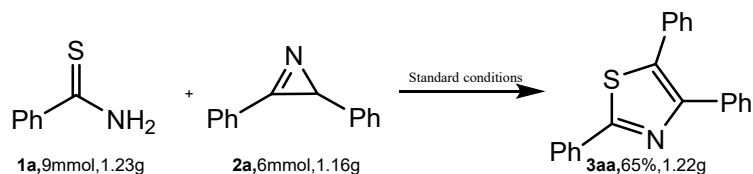

A gram-scale reaction was carried out by using thiobenzamide **1a** (9 mmol) and 2H-azirine **2a** (6 mmol) under the standard conditions, the corresponding product **3aa** was produced in 65% yield.

1. A. S. Mayhoub, L. Marler, T. P. Kondratyuk, E. J. Park, J. M. Pezzuto and M. Cushman, *Bioorg Med Chem*, 2012, **20**, 510-520.
2. J. Xuan, X. D. Xia, T. T. Zeng, Z. J. Feng, J. R. Chen, L. Q. Lu and W. J. Xiao, *Angew Chem Int Ed Engl*, 2014, **53**, 5653-5656.



### 3. Characterization data of products

#### 2,4,5-triphenylthiazole (3aa)

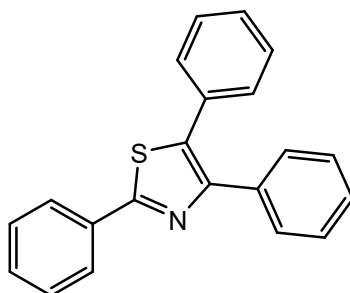

Following the general procedure the title compound was isolated by flash chromatography (eluent: ethyl acetate/*n*-hexane =1/100) as white solid in 77% yield; **M.p.** = 92-93°C.

**<sup>1</sup>H NMR** (400 MHz, DMSO-*d*<sub>6</sub>): δ 8.04 – 7.93 (m, 2H), 7.57 – 7.47 (m, 5H), 7.41 – 7.35 (m, 5H), 7.34 (d, *J* = 1.8 Hz, 1H), 7.33 (d, *J* = 2.0 Hz, 2H).

**<sup>13</sup>C NMR** (101 MHz, DMSO-*d*<sub>6</sub>): δ 165.15, 150.60, 134.84, 133.30, 133.23, 131.66, 130.95, 129.78, 129.76, 129.49, 129.15, 129.08, 128.83, 128.53, 126.53.

**HRMS (ESI)** calcd for C<sub>21</sub>H<sub>15</sub>NSH<sup>+</sup>: [M+H]<sup>+</sup> 314.0998, found: 314.0995.

#### 2-methyl-4,5-diphenylthiazole (3ba)

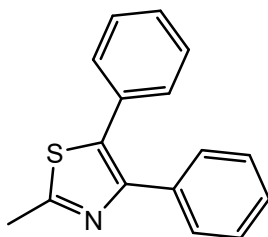

Following the general procedure the title compound was isolated by flash chromatography (eluent: ethyl acetate/*n*-hexane =1/100) as colorless oil in 55% yield; **<sup>1</sup>H NMR** (400 MHz, DMSO-*d*<sub>6</sub>): δ 7.44 – 7.40 (m, 2H), 7.39 – 7.35 (m, 3H), 7.32 – 7.27 (m, 5H), 2.70 (s, 3H).

**<sup>13</sup>C NMR** (101 MHz, DMSO-*d*<sub>6</sub>): δ 164.14, 148.98, 134.99, 132.37, 132.07, 129.75, 129.43, 128.99, 128.77, 128.75, 128.22, 19.30.

**HRMS (ESI)** calcd for C<sub>16</sub>H<sub>13</sub>NSH<sup>+</sup>: [M+H]<sup>+</sup> 252.0841, found: 252.0839.

#### 2-isopropyl-4,5-diphenylthiazole (3ca)

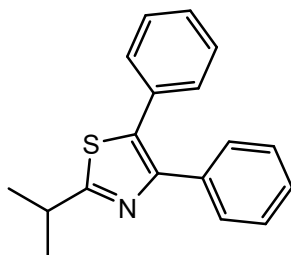

Following the general procedure the title compound was isolated by flash

chromatography (eluent: ethyl acetate/*n*-hexane =1/100) as light yellow oil in 67% yield;

**<sup>1</sup>H NMR** (400 MHz, DMSO-*d*<sub>6</sub>): δ 7.45 – 7.40 (m, 2H), 7.39 – 7.33 (m, 3H), 7.33 – 7.25 (m, 5H), 3.35 – 3.27 (m, 1H), 1.38 (d, *J* = 6.9 Hz, 6H).

**<sup>13</sup>C NMR** (101 MHz, DMSO-*d*<sub>6</sub>): δ 175.32, 148.81, 135.11, 132.15, 131.63, 129.76, 129.40, 129.05, 128.73, 128.20, 33.07, 23.24.

**HRMS (ESI)** calcd for C<sub>18</sub>H<sub>17</sub>NSH<sup>+</sup>: [M+H]<sup>+</sup> 280.1154, found: 280.1154.

### 2-(*tert*-butyl)-4,5-diphenylthiazole (3da)

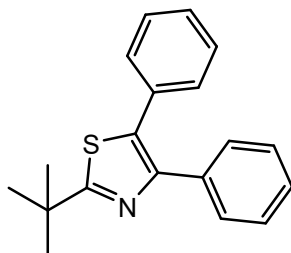

Following the general procedure the title compound was isolated by flash chromatography (eluent: ethyl acetate/*n*-hexane =1/100) as colorless oil in 56% yield;

**<sup>1</sup>H NMR** (400 MHz, DMSO-*d*<sub>6</sub>): δ 7.44 – 7.39 (m, 2H), 7.38 – 7.34 (m, 3H), 7.33 – 7.26 (m, 5H), 1.44 (s, 9H).

**<sup>13</sup>C NMR** (101 MHz, DMSO-*d*<sub>6</sub>): δ 178.59, 148.70, 135.14, 132.12, 131.68, 129.78, 129.41, 129.06, 128.76, 128.75, 128.21, 37.91, 30.97.

**HRMS (ESI)** calcd for C<sub>19</sub>H<sub>19</sub>NSH<sup>+</sup>: [M+H]<sup>+</sup> 294.1311, found: 294.1307.

### 2-cyclopropyl-4,5-diphenylthiazole (3ea)

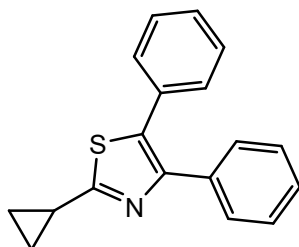

Following the general procedure the title compound was isolated by flash chromatography (eluent: ethyl acetate/*n*-hexane =1/100) as colorless oil in 71% yield;

**<sup>1</sup>H NMR** (400 MHz, DMSO-*d*<sub>6</sub>): δ 7.38 (ddd, *J* = 8.8, 3.9, 2.1 Hz, 2H), 7.36 – 7.31 (m, 3H), 7.30 – 7.24 (m, 5H), 2.41 (tt, *J* = 8.2, 4.8 Hz, 1H), 1.17 – 1.10 (m, 2H), 1.05 – 1.00 (m, 2H).

**<sup>13</sup>C NMR** (101 MHz, DMSO-*d*<sub>6</sub>): δ 171.13, 148.78, 135.06, 132.07, 130.44, 129.73, 129.38, 129.03, 128.71, 128.68, 128.22, 14.45, 11.39.

**HRMS (ESI)** calcd for C<sub>18</sub>H<sub>15</sub>NSH<sup>+</sup>: [M+H]<sup>+</sup> 278.0998, found: 278.0996.

#### 4,5-diphenyl-2-(p-tolyl)thiazole (3fa)

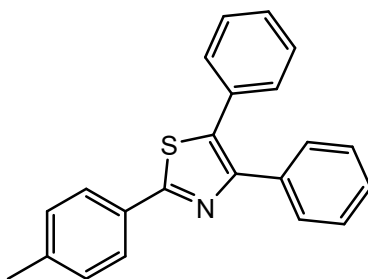

Following the general procedure the title compound was isolated by flash chromatography (eluent: ethyl acetate/*n*-hexane = 1/100) as colorless solid in 71% yield; **M.p.** = 163-165°C.

**<sup>1</sup>H NMR** (400 MHz, DMSO-*d*<sub>6</sub>): δ 7.86 (d, *J* = 8.1 Hz, 2H), 7.52 – 7.48 (m, 2H), 7.40 – 7.28 (m, 10H), 2.35 (s, 3H).

**<sup>13</sup>C NMR** (101 MHz, DMSO-*d*<sub>6</sub>): δ 165.27, 150.43, 140.82, 134.91, 132.75, 131.74, 130.64, 130.28, 129.76, 129.46, 129.14, 129.00, 128.80, 128.48, 126.45, 21.44.

**HRMS (ESI)** calcd for C<sub>22</sub>H<sub>17</sub>NSH<sup>+</sup>: [M+H]<sup>+</sup> 328.1154, found: 328.1152.

#### 4,5-diphenyl-2-(m-tolyl)thiazole (3ga)

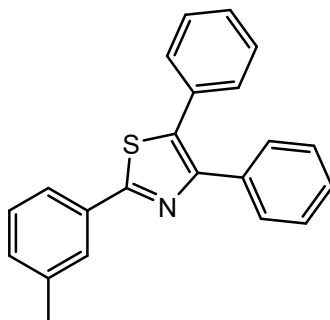

Following the general procedure the title compound was isolated by flash chromatography (eluent: ethyl acetate/*n*-hexane = 1/100) as white solid in 73% yield; **M.p.** = 167-165°C.

**<sup>1</sup>H NMR** (400 MHz, DMSO-*d*<sub>6</sub>): δ 7.81 (s, 1H), 7.77 (d, *J* = 7.7 Hz, 1H), 7.50 (dt, *J* = 5.4, 3.3 Hz, 2H), 7.43 – 7.29 (m, 10H), 2.38 (s, 3H).

**<sup>13</sup>C NMR** (101 MHz, DMSO-*d*<sub>6</sub>): δ 165.28, 150.55, 139.13, 134.88, 133.19, 133.14, 131.69, 131.64, 129.76, 129.65, 129.48, 129.16, 129.05, 128.82, 128.52, 126.86, 123.80, 21.38.

**HRMS (ESI)** calcd for C<sub>22</sub>H<sub>17</sub>NSH<sup>+</sup>: [M+H]<sup>+</sup> 328.1154, found: 328.1152.

#### 2-(4-fluorophenyl)-4,5-diphenylthiazole (3ha)

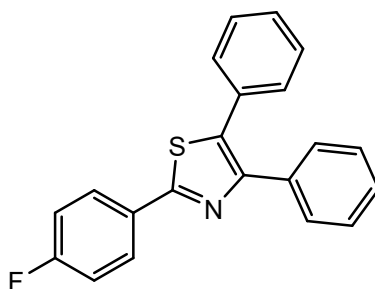

Following the general procedure the title compound was isolated by flash chromatography (eluent: ethyl acetate/*n*-hexane =1/100) as light yellow solid in 70% yield;

**M.p.** = 136-138°C.

**<sup>1</sup>H NMR** (400 MHz, DMSO-*d*<sub>6</sub>): δ 8.05 – 7.99 (m, 2H), 7.52 – 7.47 (m, 2H), 7.41 – 7.30 (m, 10H).

**<sup>13</sup>C NMR** (101 MHz, DMSO-*d*<sub>6</sub>): δ 165.03, 163.96, 162.56, 150.56, 134.75, 133.35, 131.57, 129.76, 129.49, 129.13, 128.88, 128.83, 128.55, 116.89, 116.67.

**<sup>19</sup>F NMR** (376 MHz, DMSO-*d*<sub>6</sub>) δ -110.20.

**HRMS (ESI)** calcd for C<sub>21</sub>H<sub>14</sub>FNSH<sup>+</sup>: [M+H]<sup>+</sup> 332.0904, found: 332.0901.

### 2-(4-chlorophenyl)-4,5-diphenylthiazole (3ia)

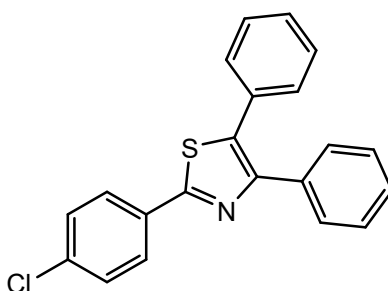

Following the general procedure the title compound was isolated by flash chromatography (eluent: ethyl acetate/*n*-hexane =1/100) as white solid in 69% yield;

**M.p.** = 173-176°C.

**<sup>1</sup>H NMR** (400 MHz, DMSO-*d*<sub>6</sub>): δ 8.03 – 7.98 (m, 2H), 7.61 – 7.57 (m, 2H), 7.51 (ddd, J = 8.8, 3.9, 2.2 Hz, 2H), 7.43 – 7.32 (m, 8H).

**<sup>13</sup>C NMR** (101 MHz, DMSO-*d*<sub>6</sub>): δ 163.78, 150.75, 135.50, 134.67, 133.76, 132.03, 131.49, 129.84, 129.79, 129.53, 129.21, 129.14, 128.87, 128.63, 128.22.

**HRMS (ESI)** calcd for C<sub>21</sub>H<sub>14</sub>ClNSH<sup>+</sup>: [M+H]<sup>+</sup> 348.0608, found: 348.0608.

### 2-(3-chlorophenyl)-4,5-diphenylthiazole (3ja)

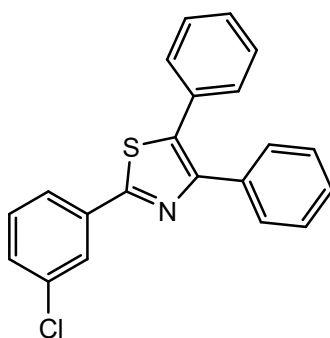

Following the general procedure the title compound was isolated by flash chromatography (eluent: ethyl acetate/*n*-hexane =1/100) as light yellow solid in 68% yield;

**M.p.** = 179-182°C.

**<sup>1</sup>H NMR** (400 MHz, DMSO-d<sub>6</sub>): δ 8.02 (d, J = 1.9 Hz, 1H), 7.93 (dt, J = 6.7, 1.8 Hz, 1H), 7.58 (ddd, J = 9.2, 5.6, 3.6 Hz, 2H), 7.54 – 7.48 (m, 2H), 7.43 – 7.32 (m, 8H).

**<sup>13</sup>C NMR** (101 MHz, DMSO-d<sub>6</sub>): δ 163.31, 150.79, 135.06, 134.60, 134.52, 134.14, 131.74, 131.41, 130.64, 129.79, 129.54, 129.27, 129.16, 128.88, 128.66, 125.77, 125.35.

**HRMS (ESI)** calcd for C<sub>21</sub>H<sub>14</sub>ClNSH<sup>+</sup>: [M+H]<sup>+</sup> 348.0608, found: 348.0608.

### 2-(4-bromophenyl)-4,5-diphenylthiazole (3ka)

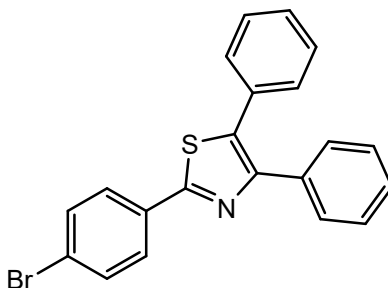

Following the general procedure the title compound was isolated by flash chromatography (eluent: ethyl acetate/*n*-hexane = 1/100) as white solid in 60% yield; **M.p.** = 202-204°C.

**<sup>1</sup>H NMR** (400 MHz, DMSO-d<sub>6</sub>): δ 7.94 – 7.89 (m, 2H), 7.73 – 7.68 (m, 2H), 7.52 – 7.46 (m, 2H), 7.42 – 7.31 (m, 8H).

**<sup>13</sup>C NMR** (101 MHz, DMSO-d<sub>6</sub>): δ 163.85, 150.76, 134.66, 133.76, 132.72, 132.35, 131.48, 129.77, 129.51, 129.19, 129.14, 128.85, 128.62, 128.38, 124.26.

**HRMS (ESI)** calcd for C<sub>21</sub>H<sub>14</sub>BrNSH<sup>+</sup>: [M+H]<sup>+</sup> 392.0103, found: 392.0101.

### 2-(2,4-dichlorophenyl)-4,5-diphenylthiazole (3la)

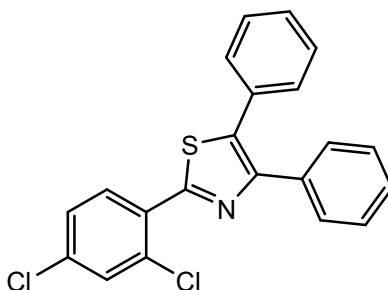

Following the general procedure the title compound was isolated by flash chromatography (eluent: ethyl acetate/*n*-hexane = 1/100) as white solid in 59% yield; **M.p.** = 210-212°C.

**<sup>1</sup>H NMR** (400 MHz, DMSO-d<sub>6</sub>): δ 8.34 (d, J = 8.6 Hz, 1H), 7.82 (d, J = 2.0 Hz, 1H), 7.59 (dd, J = 8.6, 2.0 Hz, 1H), 7.51 (dd, J = 6.6, 2.9 Hz, 2H), 7.43 – 7.36 (m, 5H), 7.36 – 7.30 (m, 3H).

**<sup>13</sup>C NMR** (101 MHz, DMSO-d<sub>6</sub>): δ 159.18, 149.56, 135.47, 135.20, 134.46, 132.00, 131.92, 131.18, 130.64, 130.30, 129.81, 129.54, 129.29, 129.13, 128.87, 128.66, 128.56.

**HRMS (ESI)** calcd for C<sub>21</sub>H<sub>13</sub>Cl<sub>2</sub>NSH<sup>+</sup>: [M+H]<sup>+</sup> 382.0219, found: 382.0222.

### 2-([1,1'-biphenyl]-4-yl)-4,5-diphenylthiazole (3ma)

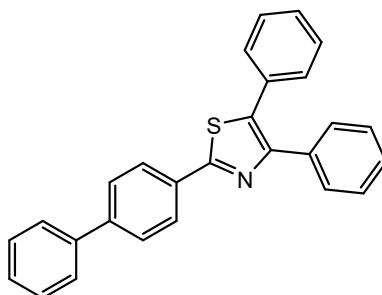

Following the general procedure the title compound was isolated by flash chromatography (eluent: ethyl acetate/*n*-hexane =1/100) as white solid in 64% yield; **M.p.** = 226-228°C.

**<sup>1</sup>H NMR** (400 MHz, DMSO-*d*<sub>6</sub>): δ 8.08 (d, *J* = 8.4 Hz, 2H), 7.84 (d, *J* = 8.4 Hz, 2H), 7.78 – 7.73 (m, 2H), 7.56 – 7.48 (m, 4H), 7.45 – 7.38 (m, 6H), 7.38 – 7.32 (m, 3H).

**<sup>13</sup>C NMR** (101 MHz, DMSO-*d*<sub>6</sub>): δ 164.75, 150.73, 142.42, 139.53, 134.83, 133.35, 132.23, 131.66, 129.81, 129.56, 129.53, 129.18, 129.14, 128.88, 128.60, 128.53, 127.95, 127.17, 127.13.

**HRMS (ESI)** calcd for C<sub>27</sub>H<sub>19</sub>NSH<sup>+</sup>: [M+H]<sup>+</sup> 390.1311, found: 390.1307.

### 2-(naphthalen-2-yl)-4,5-diphenylthiazole (3na)

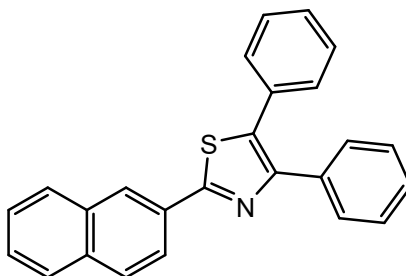

Following the general procedure the title compound was isolated by flash chromatography (eluent: ethyl acetate/*n*-hexane =1/100) as white solid in 51% yield; **M.p.** = 219-222°C.

**<sup>1</sup>H NMR** (400 MHz, DMSO-*d*<sub>6</sub>): δ 8.57 (s, 1H), 8.14 – 8.02 (m, 4H), 8.00 – 7.90 (m, 1H), 7.79 – 7.53 (m, 5H), 7.47 – 7.27 (m, 6H).

**<sup>13</sup>C NMR** (101 MHz, DMSO-*d*<sub>6</sub>): δ 165.15, 150.80, 134.84, 134.24, 133.51, 133.37, 132.34, 131.67, 130.65, 129.80, 129.55, 129.45, 129.22, 129.13, 128.97, 128.88, 128.61, 128.49, 128.28, 128.24, 127.85, 127.57, 126.79, 125.97, 123.89.

**HRMS (ESI)** calcd for C<sub>25</sub>H<sub>17</sub>NSH<sup>+</sup>: [M+H]<sup>+</sup> 364.1154, found: 364.1151.

### 4,5-diphenyl-2-(4-(trifluoromethyl)phenyl)thiazole (3oa)

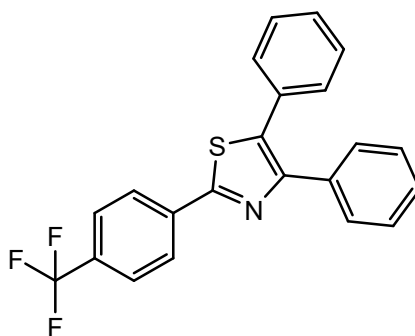

Following the general procedure the title compound was isolated by flash chromatography (eluent: ethyl acetate/*n*-hexane =1/100) as colorless oil in 64% yield;  $^1\text{H NMR}$  (400 MHz, DMSO- $d_6$ ):  $\delta$  8.17 (d,  $J$  = 8.1 Hz, 2H), 7.85 (d,  $J$  = 8.3 Hz, 2H), 7.50 (ddd,  $J$  = 4.8, 3.5, 1.8 Hz, 2H), 7.44 – 7.29 (m, 8H).

$^{13}\text{C NMR}$  (101 MHz, DMSO- $d_6$ ):  $\delta$  163.24, 151.09, 136.69, 134.71, 134.54, 131.32, 129.80, 129.56, 129.34, 129.16, 128.90, 128.72, 127.20, 126.77, 126.73.

$^{19}\text{F NMR}$  (376 MHz, DMSO- $d_6$ )  $\delta$  -61.30.

**HRMS (ESI)** calcd for  $\text{C}_{22}\text{H}_{14}\text{F}_3\text{NSH}^+$ :  $[\text{M}+\text{H}]^+$  382.0872, found: 382.0869.

### 2-(4-methoxyphenyl)-4,5-diphenylthiazole (3pa)

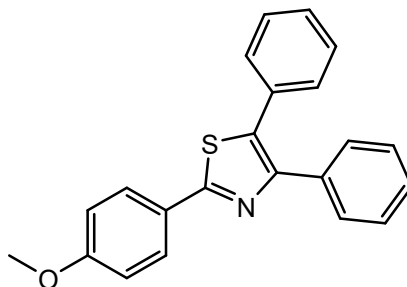

Following the general procedure the title compound was isolated by flash chromatography (eluent: ethyl acetate/*n*-hexane =1/100) as white solid in 73% yield;

**M.p.** = 153-155°C

$^1\text{H NMR}$  (400 MHz, DMSO- $d_6$ ):  $\delta$  7.93 (d,  $J$  = 8.6 Hz, 2H), 7.54 – 7.46 (m, 2H), 7.44 – 7.29 (m, 8H), 7.08 (d,  $J$  = 8.7 Hz, 2H), 3.83 (s, 3H).

$^{13}\text{C NMR}$  (101 MHz, DMSO- $d_6$ ):  $\delta$  165.09, 161.54, 150.29, 134.97, 132.20, 131.82, 129.76, 129.48, 129.15, 128.96, 128.83, 128.47, 128.15, 126.02, 115.12, 55.88.

**HRMS (ESI)** calcd for  $\text{C}_{22}\text{H}_{17}\text{NOSH}^+$ :  $[\text{M}+\text{H}]^+$  344.1104, found: 344.1101.

### 2-(3-methoxyphenyl)-4,5-diphenylthiazole (3qa)

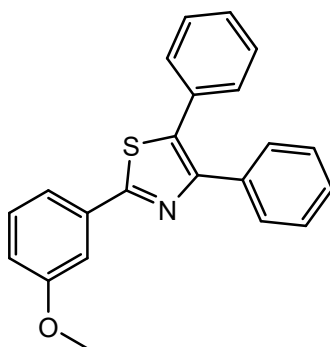

Following the general procedure the title compound was isolated by flash chromatography (eluent: ethyl acetate/*n*-hexane =1/100) as white solid in 70% yield; **M.p.** = 160-162°C.

**<sup>1</sup>H NMR** (400 MHz, DMSO-*d*<sub>6</sub>): δ 7.57 – 7.49 (m, 4H), 7.43 (dd, *J* = 12.9, 5.0 Hz, 1H), 7.41 – 7.31 (m, 8H), 7.11 – 7.07 (m, 1H), 3.84 (s, 3H).

**<sup>13</sup>C NMR** (101 MHz, DMSO-*d*<sub>6</sub>): δ 164.92, 160.23, 150.58, 134.84, 134.52, 133.43, 131.62, 130.98, 129.78, 129.49, 129.18, 129.11, 128.85, 128.55, 119.07, 116.77, 111.33, 55.79.

**HRMS (ESI)** calcd for C<sub>22</sub>H<sub>17</sub>NOSH<sup>+</sup>: [M+H]<sup>+</sup> 344.1104, found: 344.1101.

### 4-(4-ethylphenyl)-2,5-diphenylthiazole (3ad)

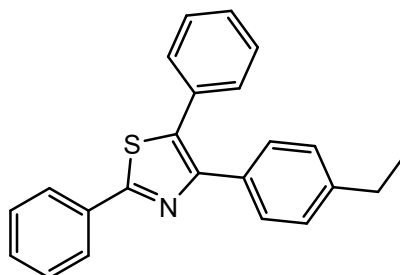

Following the general procedure the title compound was isolated by flash chromatography (eluent: ethyl acetate/*n*-hexane =1/100) as colorless oil in 68% yield; **<sup>1</sup>H NMR** (400 MHz, DMSO-*d*<sub>6</sub>): δ 8.01 – 7.94 (m, 2H), 7.55 – 7.48 (m, 3H), 7.45 – 7.40 (m, 2H), 7.38 (d, *J* = 4.0 Hz, 5H), 7.15 (d, *J* = 8.3 Hz, 2H), 2.58 (q, *J* = 7.6 Hz, 2H), 1.16 (t, *J* = 7.6 Hz, 3H).

**<sup>13</sup>C NMR** (101 MHz, DMSO-*d*<sub>6</sub>): δ 164.99, 150.64, 144.13, 133.27, 132.68, 132.26, 131.80, 130.89, 129.77, 129.74, 129.47, 129.08, 129.01, 128.18, 126.49, 28.35, 15.76.

**HRMS (ESI)** calcd for C<sub>23</sub>H<sub>19</sub>NSH<sup>+</sup>: [M+H]<sup>+</sup> 342.1311, found: 342.1308.



#### 4-(2,5-dimethylphenyl)-2,5-diphenylthiazole (3ae)

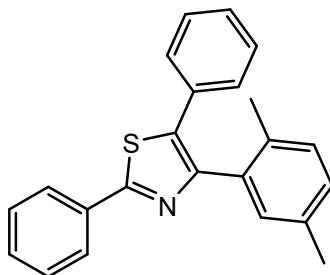

Following the general procedure the title compound was isolated by flash chromatography (eluent: ethyl acetate/*n*-hexane =1/100) as white solid in 72% yield;

**M.p.** = 155-157°C.

**<sup>1</sup>H NMR** (400 MHz, DMSO-*d*<sub>6</sub>): δ 7.96 (dt, *J* = 5.0, 3.0 Hz, 2H), 7.55 – 7.48 (m, 3H), 7.33 – 7.26 (m, 3H), 7.25 – 7.20 (m, 2H), 7.17 – 7.09 (m, 3H), 2.24 (s, 3H), 1.97 (s, 3H).

**<sup>13</sup>C NMR** (101 MHz, DMSO-*d*<sub>6</sub>): δ 164.51, 151.44, 135.31, 135.21, 134.14, 133.66, 133.33, 131.70, 131.10, 130.89, 130.69, 129.76, 129.66, 129.36, 128.62, 128.51, 126.47, 20.93, 19.51

**HRMS (ESI)** calcd for C<sub>23</sub>H<sub>19</sub>NSH<sup>+</sup>: [M+H]<sup>+</sup> 342.1311, found: 342.1308.

#### 4-benzyl-2,5-diphenylthiazole (3af)

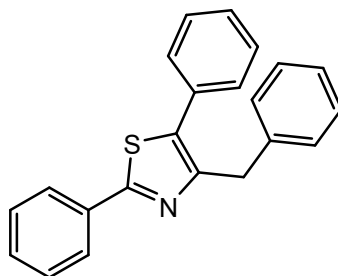

Following the general procedure the title compound was isolated by flash chromatography (eluent: ethyl acetate/*n*-hexane =1/100) as light yellow oil in 49% yield;

**<sup>1</sup>H NMR** (400 MHz, DMSO-*d*<sub>6</sub>): δ 7.96 – 7.90 (m, 2H), 7.55 – 7.41 (m, 8H), 7.32 – 7.18 (m, 5H), 4.17 (s, 2H).

**<sup>13</sup>C NMR** (101 MHz, DMSO-*d*<sub>6</sub>): δ 165.05, 151.18, 139.87, 133.67, 133.29, 131.39, 130.82, 129.75, 129.61, 129.47, 128.99, 128.95, 128.82, 126.64, 126.43, 35.28.

**HRMS (ESI)** calcd for C<sub>22</sub>H<sub>17</sub>NSH<sup>+</sup>: [M+H]<sup>+</sup> 328.1154, found: 328.1151.

#### 4-(naphthalen-2-yl)-2,5-diphenylthiazole (3ag)

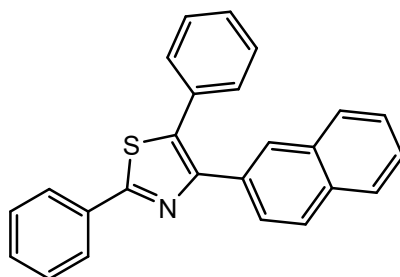

Following the general procedure the title compound was isolated by flash chromatography (eluent: ethyl acetate/*n*-hexane =1/100) as colorless oil in 65% yield; <sup>1</sup>H NMR (400 MHz, DMSO-d<sub>6</sub>): δ 8.15 (s, 1H), 8.02 (dd, J = 7.3, 2.0 Hz, 2H), 7.90 – 7.86 (m, 1H), 7.82 (d, J = 8.1 Hz, 2H), 7.57 – 7.46 (m, 6H), 7.42 – 7.35 (m, 5H).

<sup>13</sup>C NMR (101 MHz, DMSO-d<sub>6</sub>): δ 165.31, 150.50, 133.69, 133.29, 133.24, 132.89, 132.38, 131.65, 130.99, 129.81, 129.77, 129.51, 129.14, 128.57, 128.41, 128.13, 128.02, 126.99, 126.92, 126.89, 126.60.

HRMS (ESI) calcd for C<sub>25</sub>H<sub>17</sub>NSH<sup>+</sup>: [M+H]<sup>+</sup> 364.1154, found: 364.1150.

#### 4-(4-fluorophenyl)-2,5-diphenylthiazole (3ah)

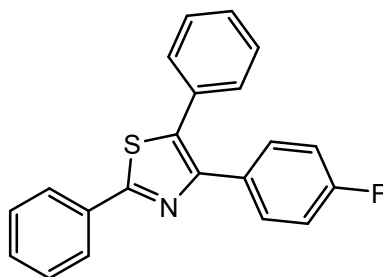

Following the general procedure the title compound was isolated by flash chromatography (eluent: ethyl acetate/*n*-hexane =1/100) as colorless oil in 72% yield; <sup>1</sup>H NMR (400 MHz, DMSO-d<sub>6</sub>): δ 8.01 – 7.95 (m, 2H), 7.57 – 7.49 (m, 5H), 7.43 – 7.34 (m, 5H), 7.21 – 7.14 (m, 2H).

<sup>13</sup>C NMR (101 MHz, DMSO-d<sub>6</sub>): δ 165.23, 163.47, 161.03, 149.53, 133.15, 131.48, 131.26, 131.18, 130.99, 129.77, 129.57, 129.18, 126.53, 115.90, 115.69.

<sup>19</sup>F NMR (376 MHz, DMSO-d<sub>6</sub>) δ -113.43.

HRMS (ESI) calcd for C<sub>21</sub>H<sub>14</sub>FNSH<sup>+</sup>: [M+H]<sup>+</sup> 332.0904, found: 332.0901.

#### 4-(4-chlorophenyl)-2,5-diphenylthiazole (3ai)

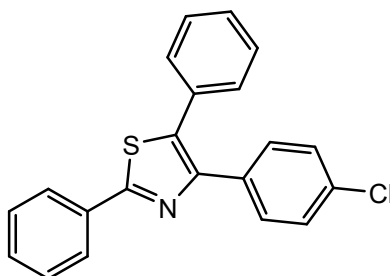

Following the general procedure the title compound was isolated by flash chromatography (eluent: ethyl acetate/*n*-hexane =1/100) as light yellow oil in 72% yield;

<sup>1</sup>H NMR (400 MHz, DMSO-d<sub>6</sub>): δ 8.00 – 7.94 (m, 2H), 7.54 – 7.47 (m, 5H), 7.43 – 7.35 (m, 7H).

<sup>13</sup>C NMR (101 MHz, DMSO-d<sub>6</sub>): δ 165.41, 149.20, 133.84, 133.62, 133.21, 133.08, 131.35, 131.03, 130.81, 130.07, 129.77, 129.61, 129.28, 128.91, 126.55.

HRMS (ESI) calcd for C<sub>21</sub>H<sub>14</sub>ClNSH<sup>+</sup>: [M+H]<sup>+</sup> 348.0608, found: 348.0605.

#### 4-(4-bromophenyl)-2,5-diphenylthiazole (3aj)

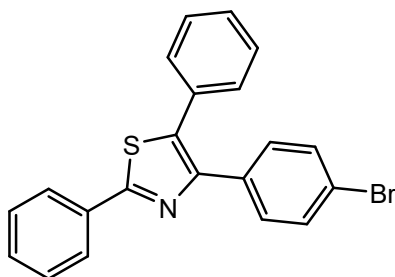

Following the general procedure the title compound was isolated by flash chromatography (eluent: ethyl acetate/*n*-hexane =1/100) as white solid in 67% yield; **M.p.** = 207-209°C.

**<sup>1</sup>H NMR** (400 MHz, DMSO-*d*<sub>6</sub>): δ 8.00 – 7.94 (m, 2H), 7.55 – 7.49 (m, 5H), 7.45 (q, *J* = 2.4 Hz, 1H), 7.44 – 7.34 (m, 6H).

**<sup>13</sup>C NMR** (101 MHz, DMSO-*d*<sub>6</sub>): δ 165.44, 149.24, 133.98, 133.88, 133.07, 131.83, 131.35, 131.10, 131.04, 129.77, 129.62, 129.48, 129.29, 126.55, 121.89.

**HRMS (ESI)** calcd for C<sub>21</sub>H<sub>14</sub>BrNSH<sup>+</sup>: [M+H]<sup>+</sup> 392.0103, found: 392.0102.

#### 4-(4-methoxyphenyl)-2,5-diphenylthiazole (3ak)

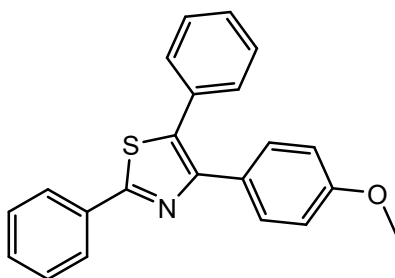

Following the general procedure the title compound was isolated by flash chromatography (eluent: ethyl acetate/*n*-hexane =1/100) as white solid in 67% yield; **M.p.** = 171-173°C.

**<sup>1</sup>H NMR** (400 MHz, DMSO-*d*<sub>6</sub>): δ 8.03 – 7.91 (m, 2H), 7.55 – 7.48 (m, 3H), 7.47 – 7.42 (m, 2H), 7.41 – 7.34 (m, 5H), 6.93 – 6.85 (m, 2H), 3.75 (s, 3H).

**<sup>13</sup>C NMR** (101 MHz, DMSO-*d*<sub>6</sub>): δ 164.89, 159.49, 150.45, 133.31, 131.92, 131.83, 130.86, 130.43, 129.75, 129.73, 129.48, 128.94, 127.23, 126.48, 114.23, 55.57.

**HRMS (ESI)** calcd for C<sub>22</sub>H<sub>17</sub>NOSH<sup>+</sup>: [M+H]<sup>+</sup> 344.1104, found: 344.1100.

#### 2,4-diphenyl-5-(*p*-tolyl)thiazole (3al)

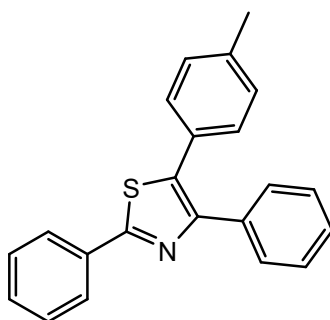

Following the general procedure the title compound was isolated by flash

chromatography (eluent: ethyl acetate/*n*-hexane =1/100) as colorless oil in 71% yield;  
**<sup>1</sup>H NMR** (400 MHz, DMSO-*d*<sub>6</sub>): δ 8.01 – 7.93 (m, 2H), 7.56 – 7.46 (m, 5H), 7.38 – 7.29 (m, 3H), 7.24 (d, *J* = 8.1 Hz, 2H), 7.22 – 7.15 (m, 2H), 2.30 (s, 3H).  
**<sup>13</sup>C NMR** (101 MHz, DMSO-*d*<sub>6</sub>): δ 164.83, 150.30, 138.63, 134.97, 133.47, 133.28, 130.86, 130.05, 129.73, 129.60, 129.11, 128.81, 128.67, 128.45, 126.48, 21.27.  
**HRMS (ESI)** calcd for C<sub>22</sub>H<sub>17</sub>NSH<sup>+</sup>: [M+H]<sup>+</sup> 328.1154, found: 328.1151.

### 5-(4-chlorophenyl)-2,4-diphenylthiazole (3am)

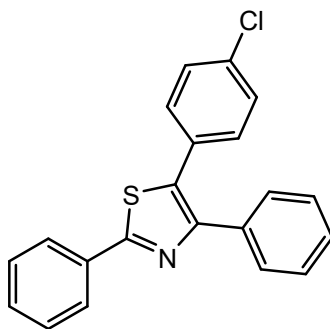

Following the general procedure the title compound was isolated by flash chromatography (eluent: ethyl acetate/*n*-hexane =1/100) as white solid in 66% yield;  
**M.p.** = 176-179°C.

**<sup>1</sup>H NMR** (400 MHz, DMSO-*d*<sub>6</sub>): δ 8.00 – 7.93 (m, 2H), 7.54 – 7.47 (m, 5H), 7.46 – 7.41 (m, 2H), 7.38 – 7.32 (m, 5H).

**<sup>13</sup>C NMR** (101 MHz, DMSO-*d*<sub>6</sub>): δ 165.49, 151.10, 134.58, 133.79, 133.11, 131.85, 131.52, 131.06, 130.57, 129.78, 129.54, 129.20, 128.95, 128.71, 126.56.

**HRMS (ESI)** calcd for C<sub>21</sub>H<sub>14</sub>ClNSH<sup>+</sup>: [M+H]<sup>+</sup> 348.0608, found: 348.0608.

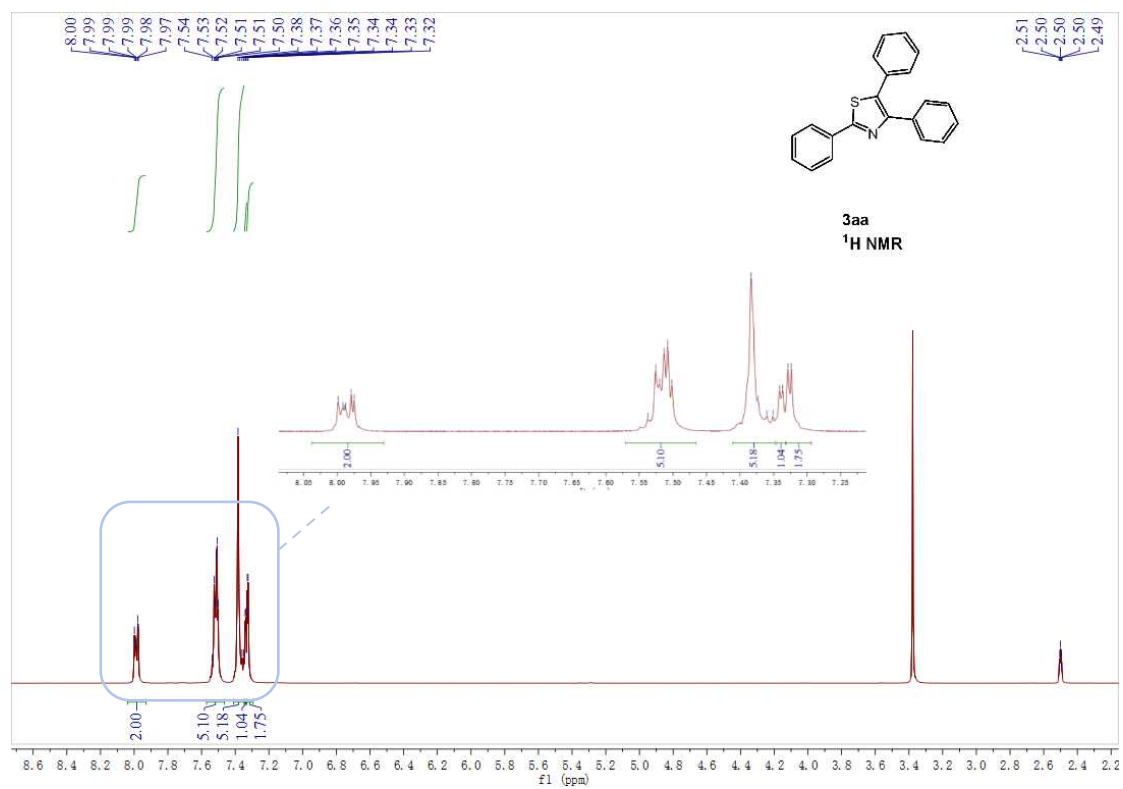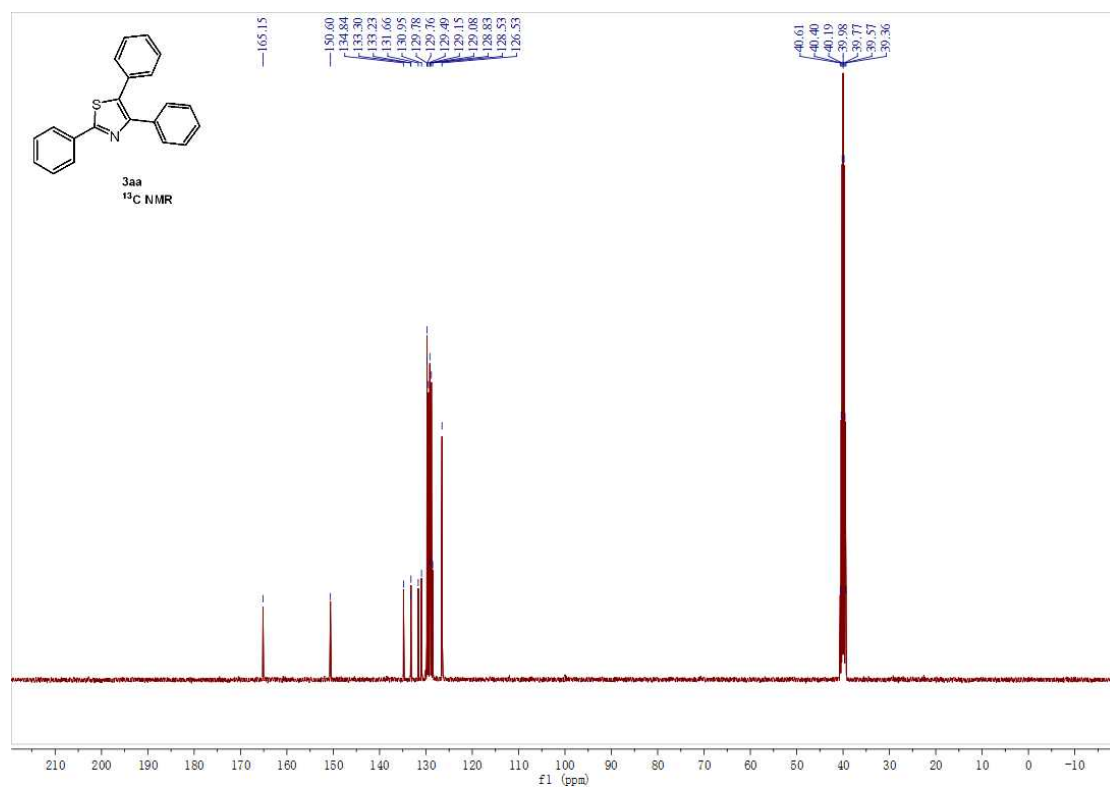

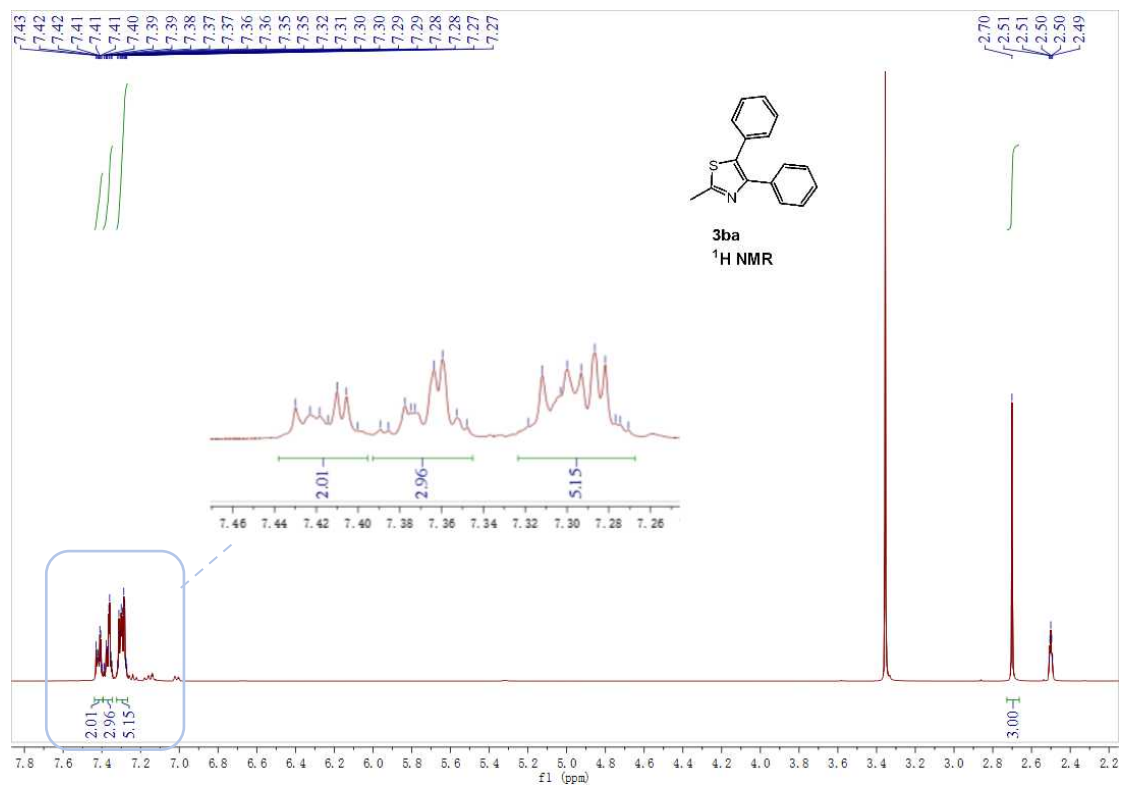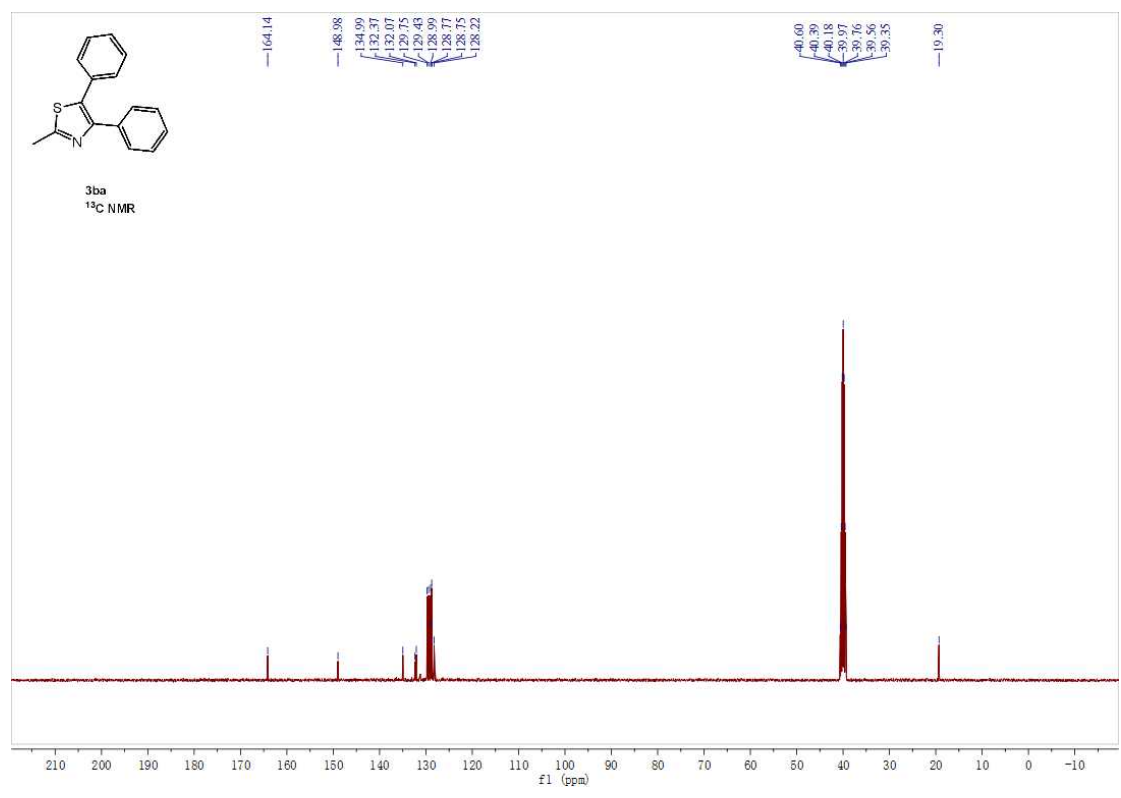

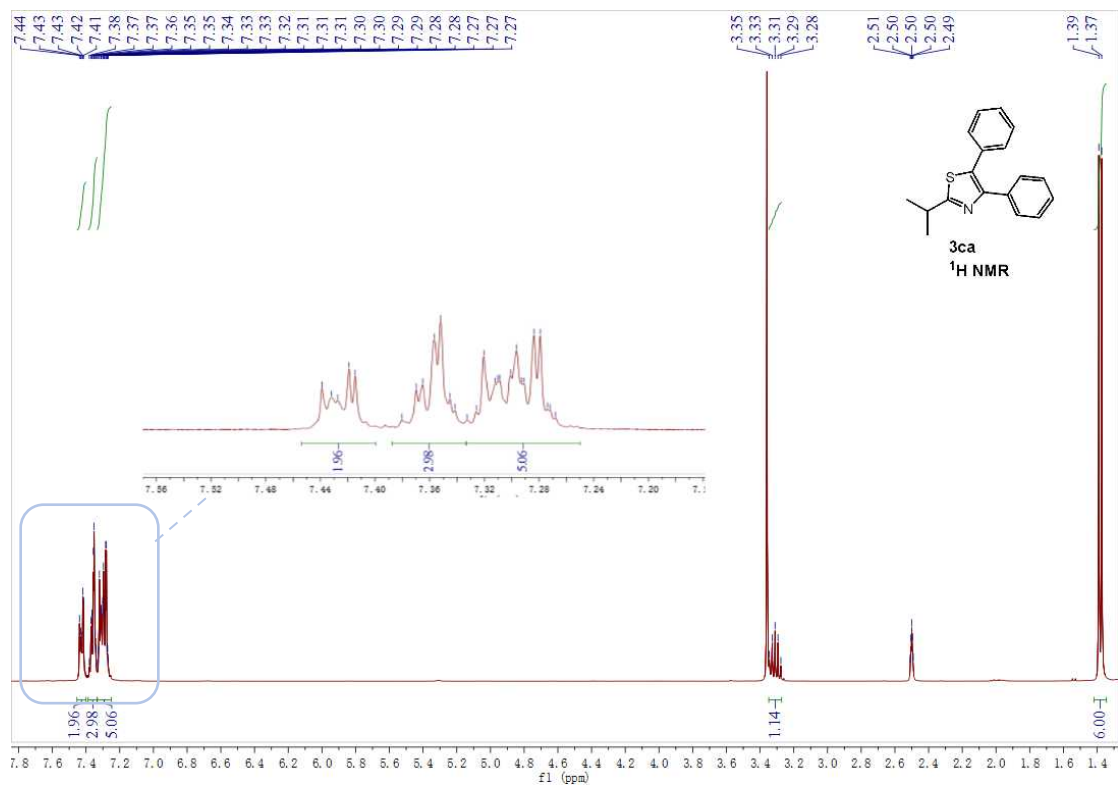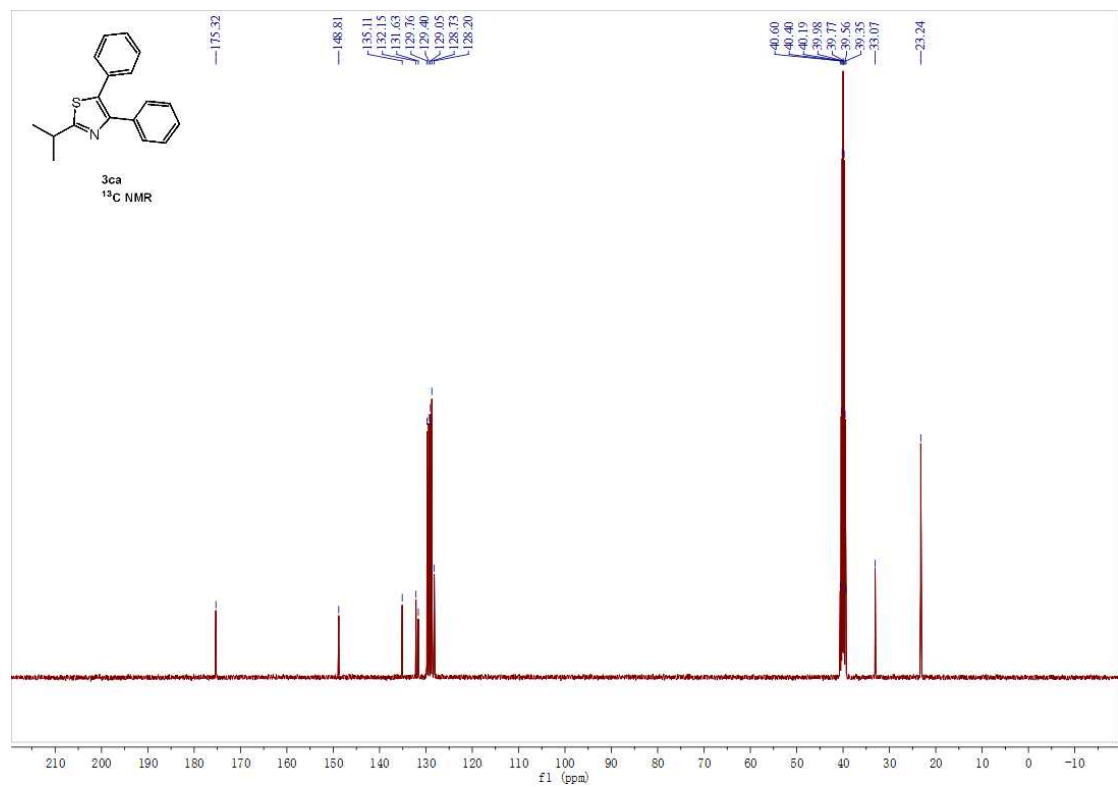

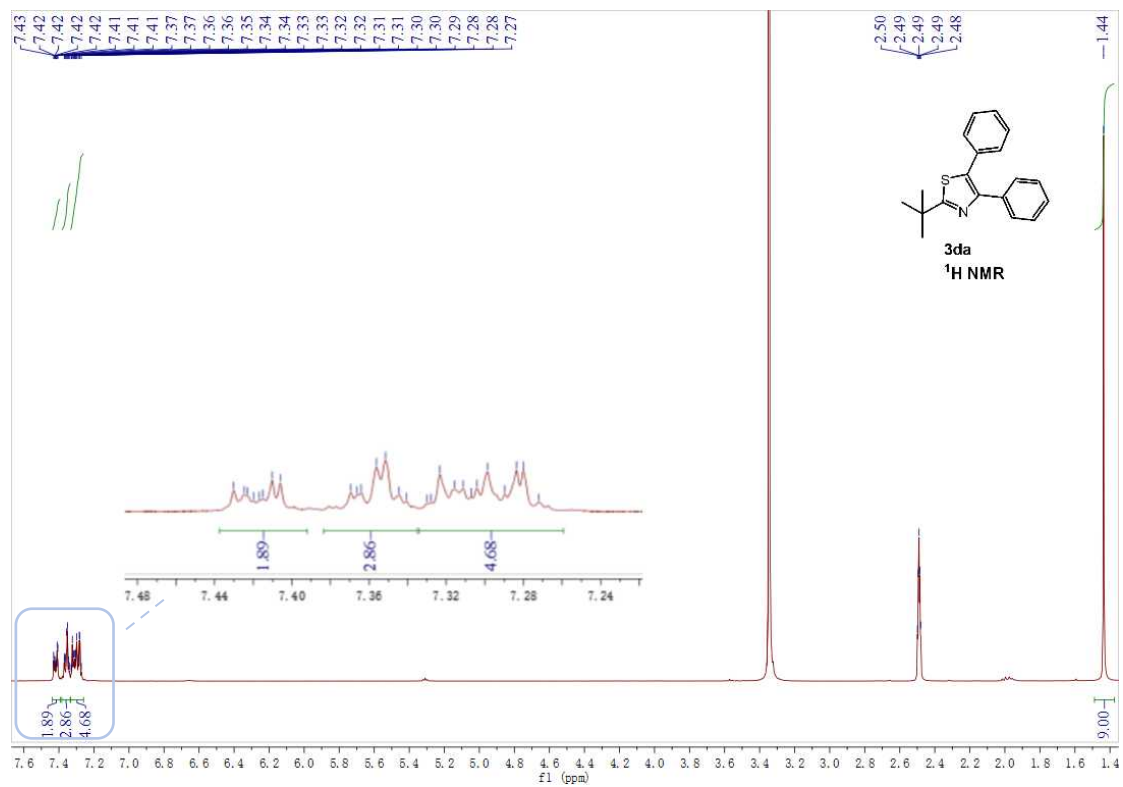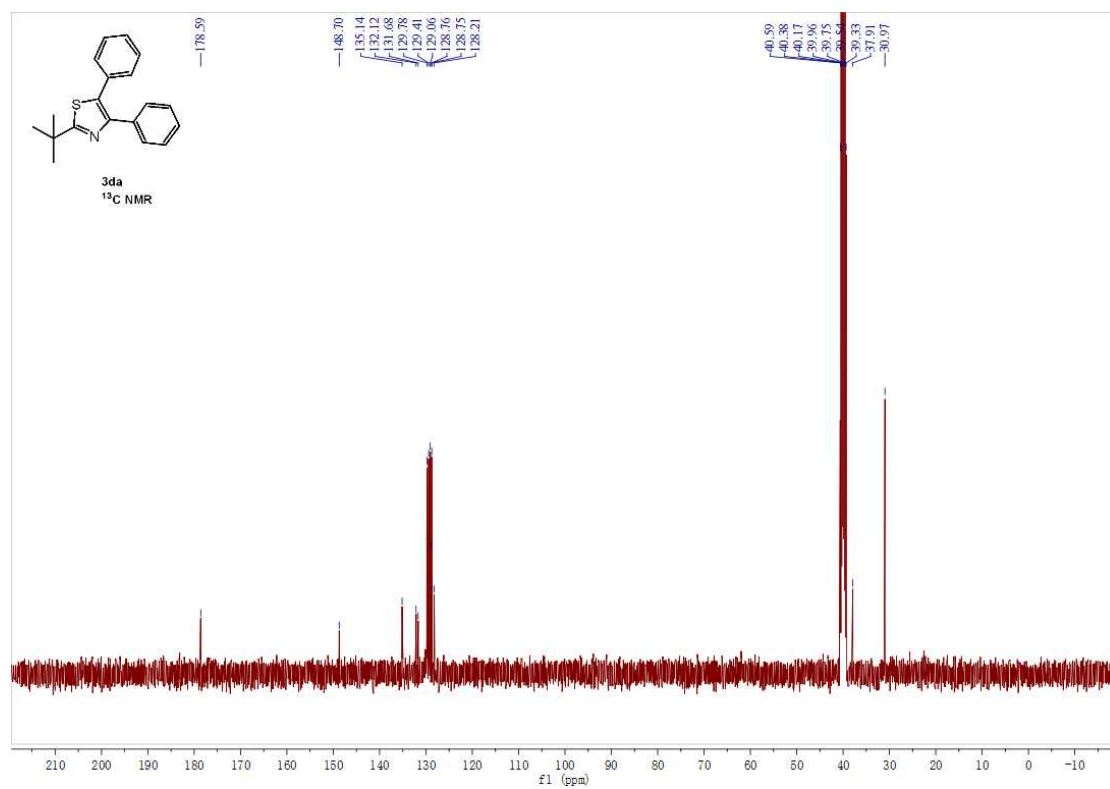



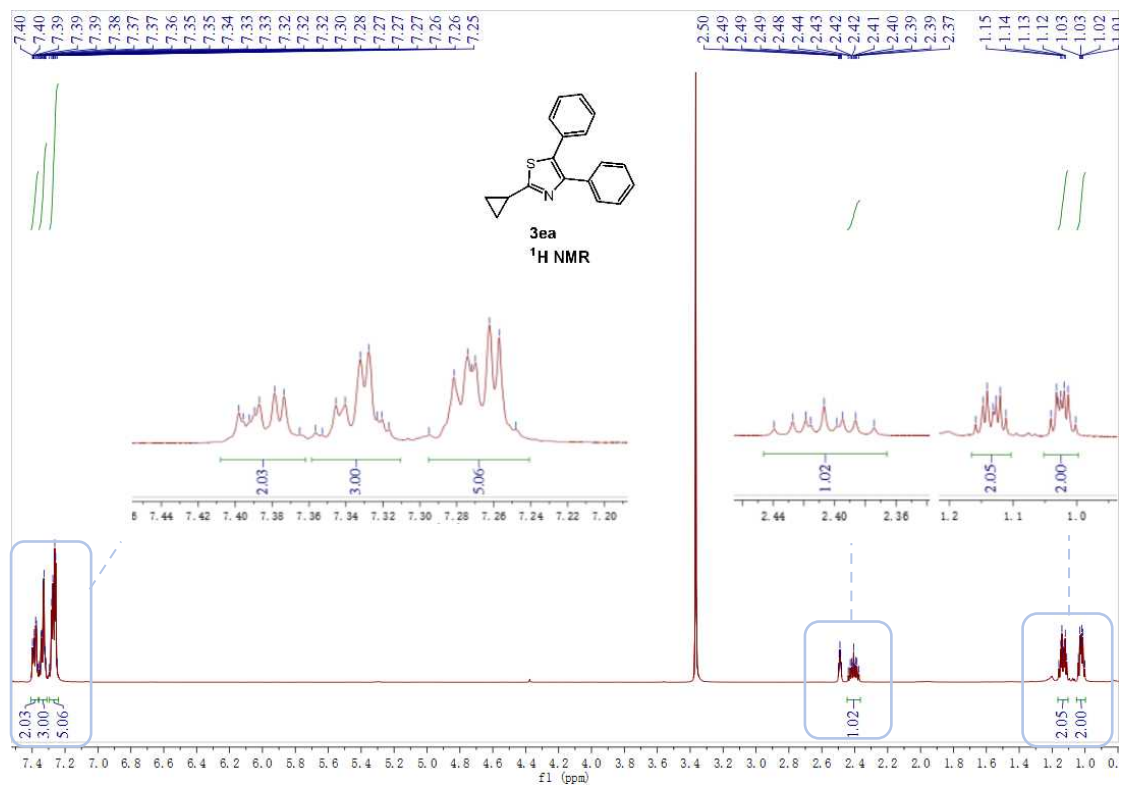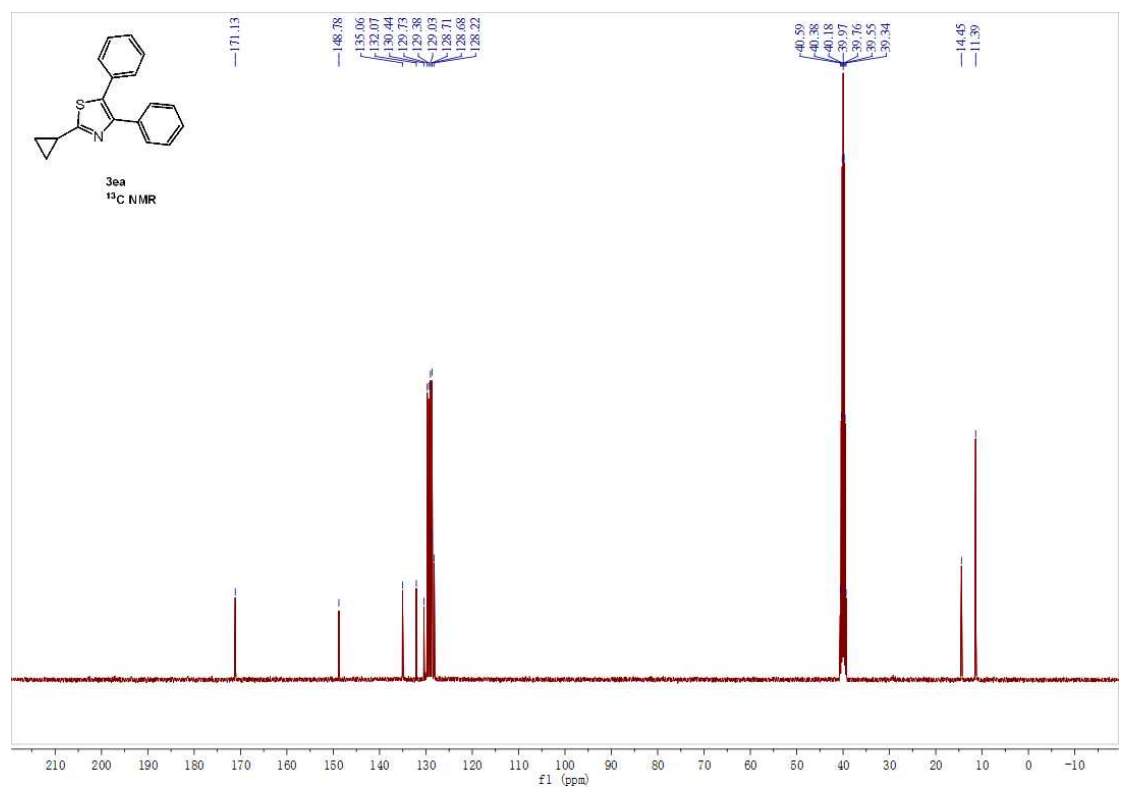

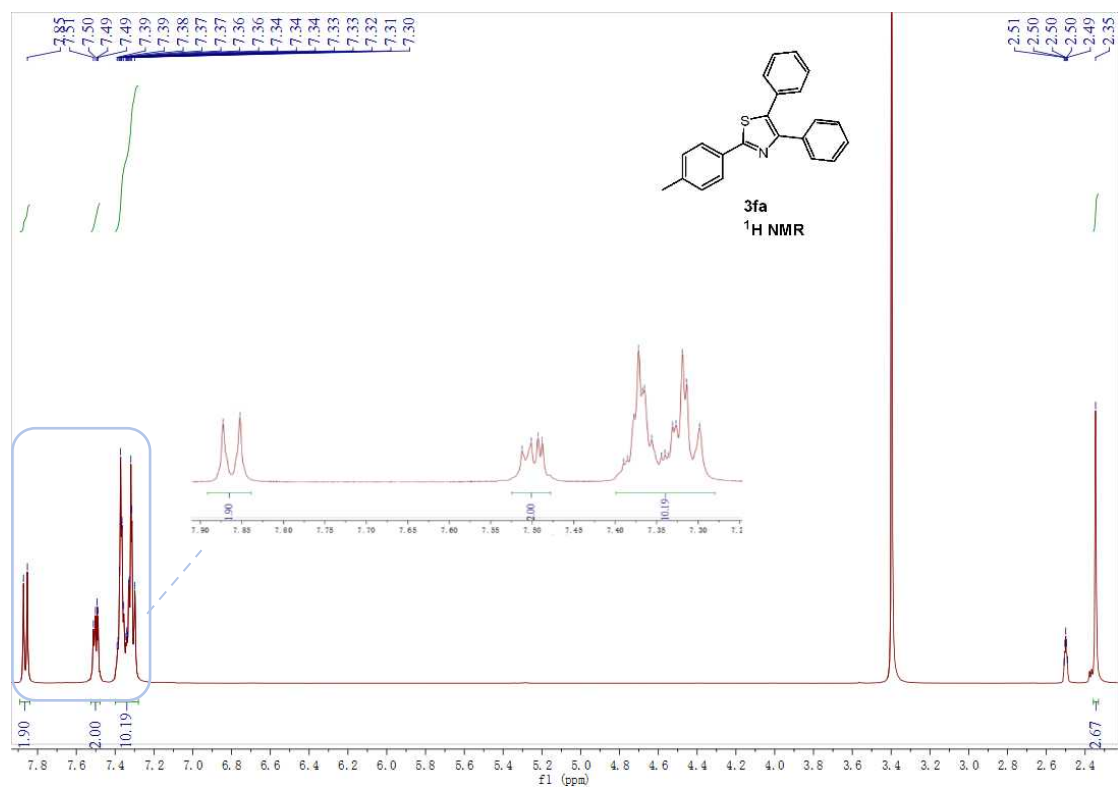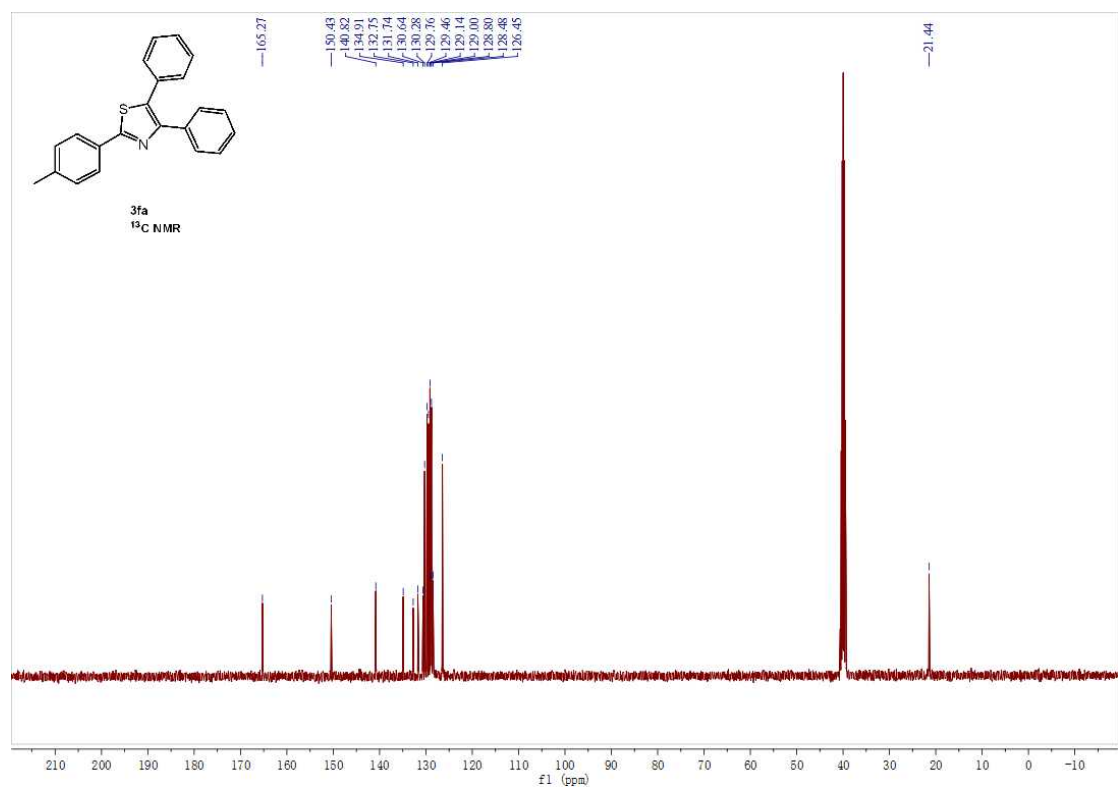

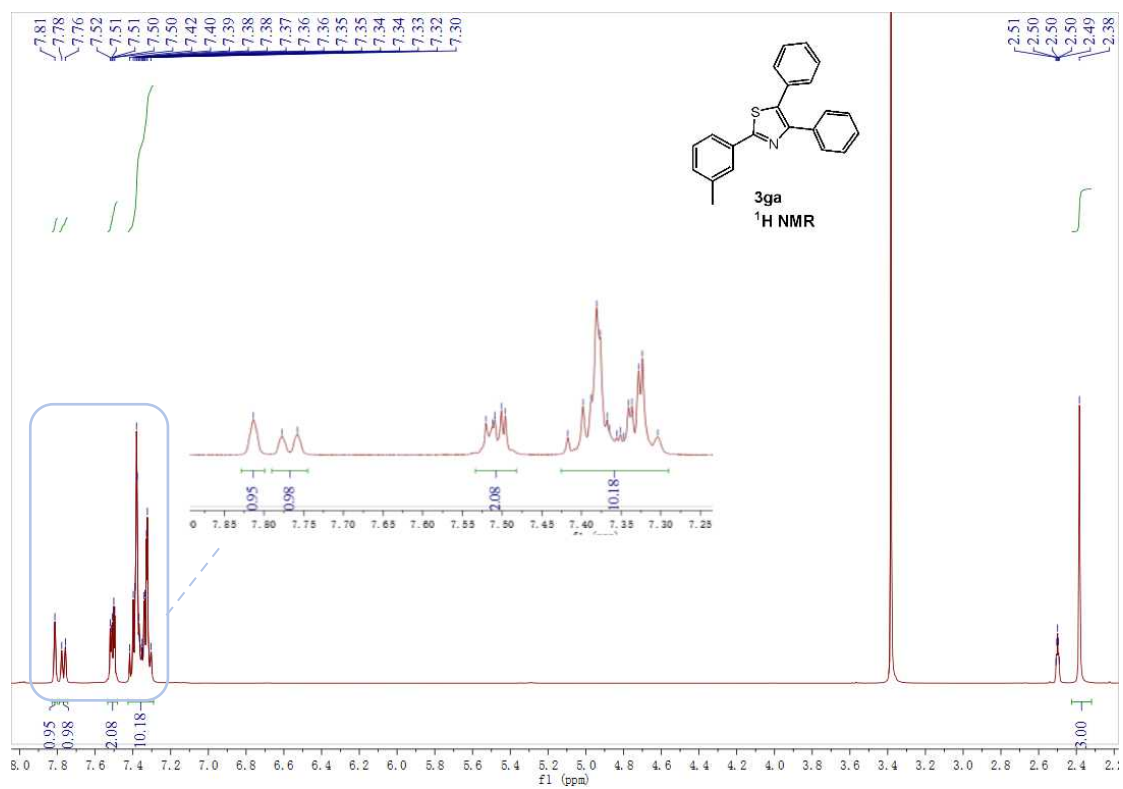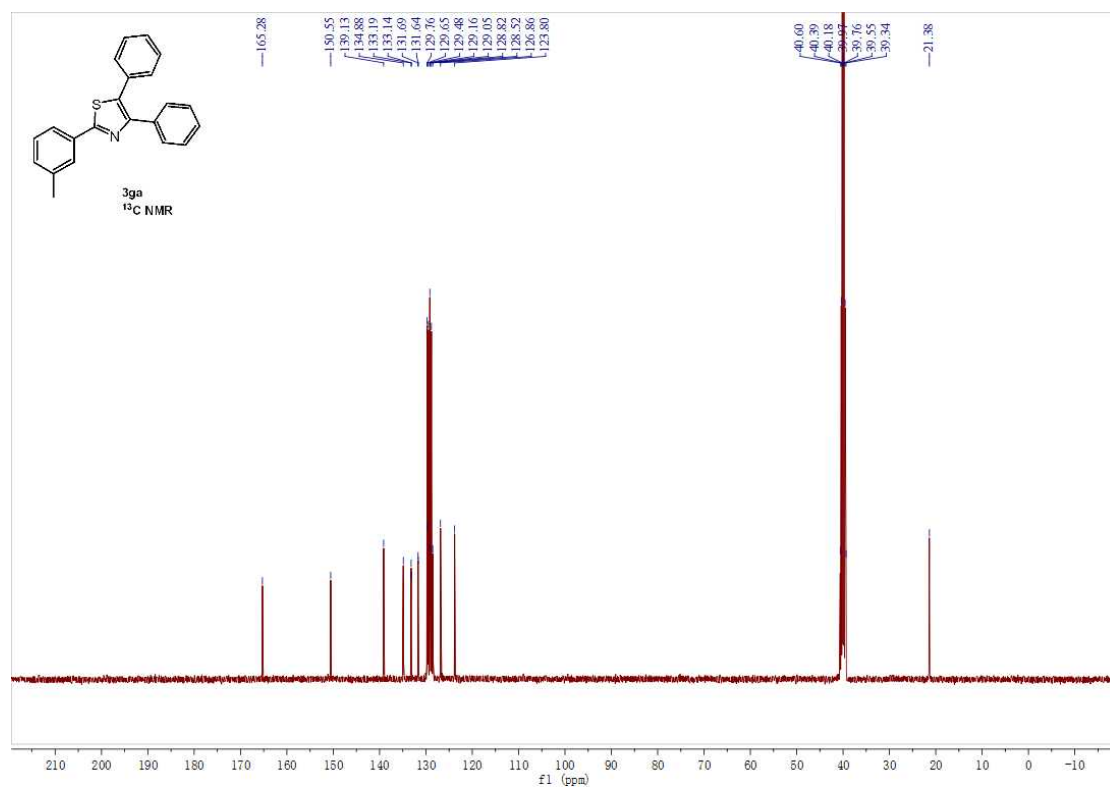

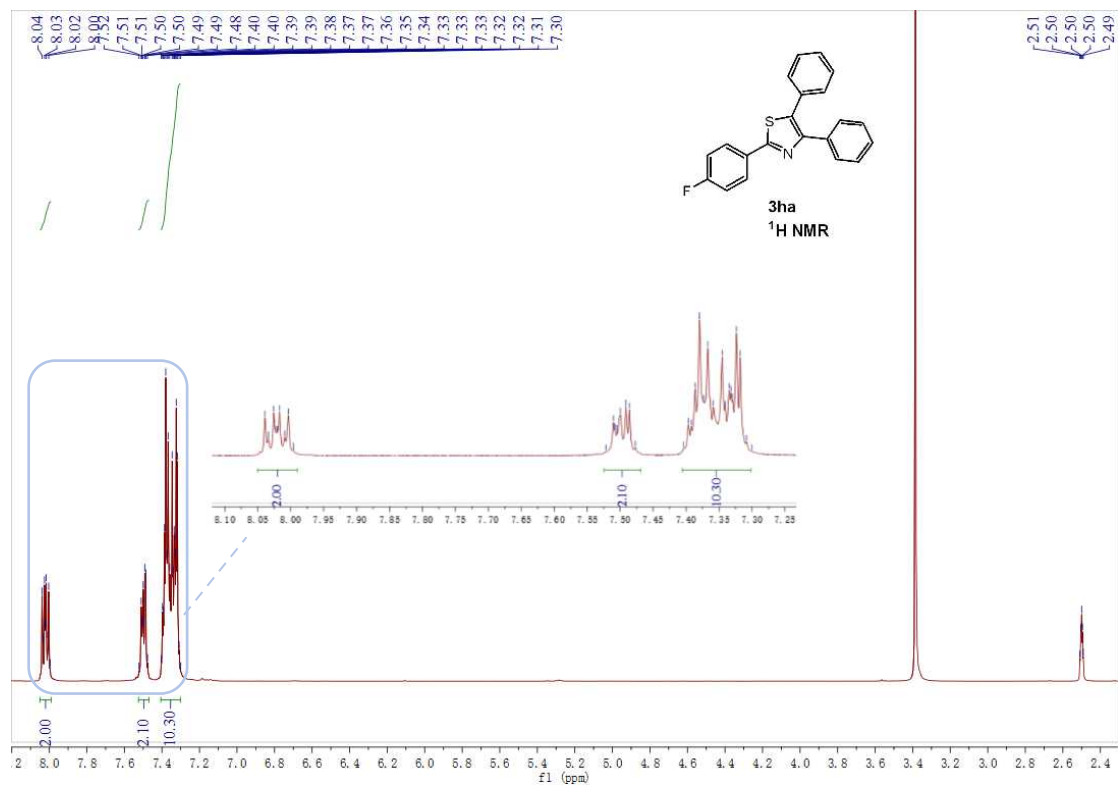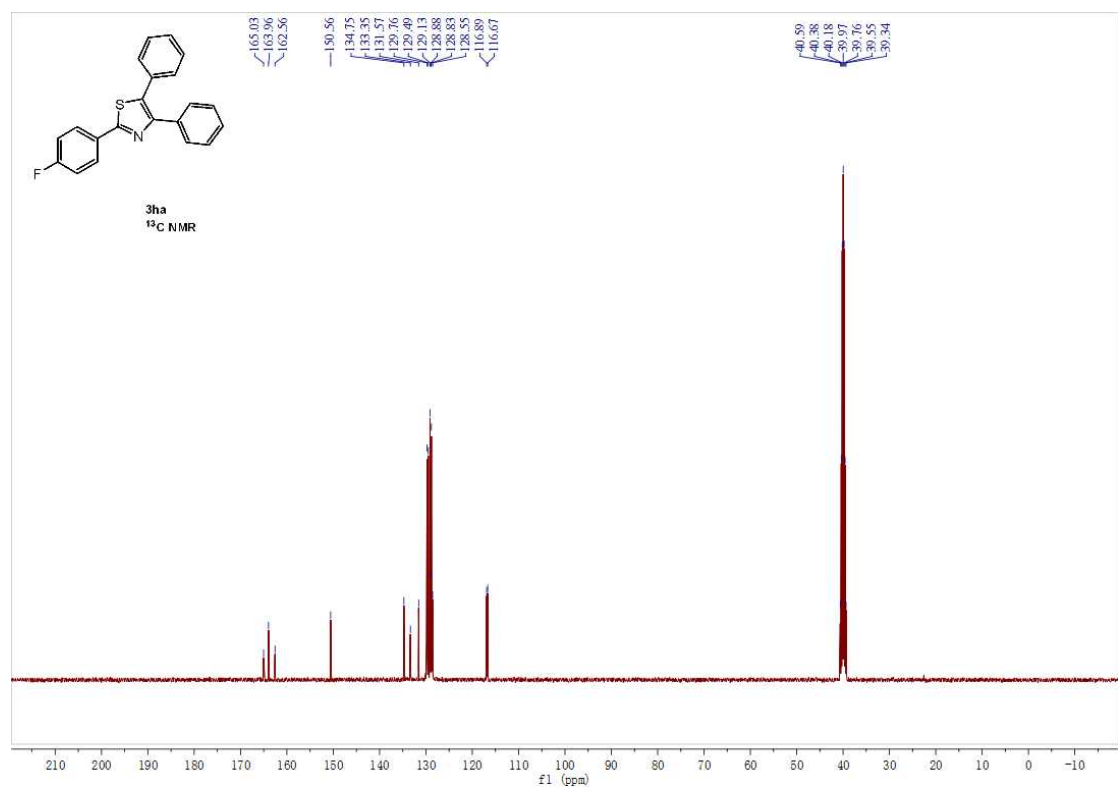

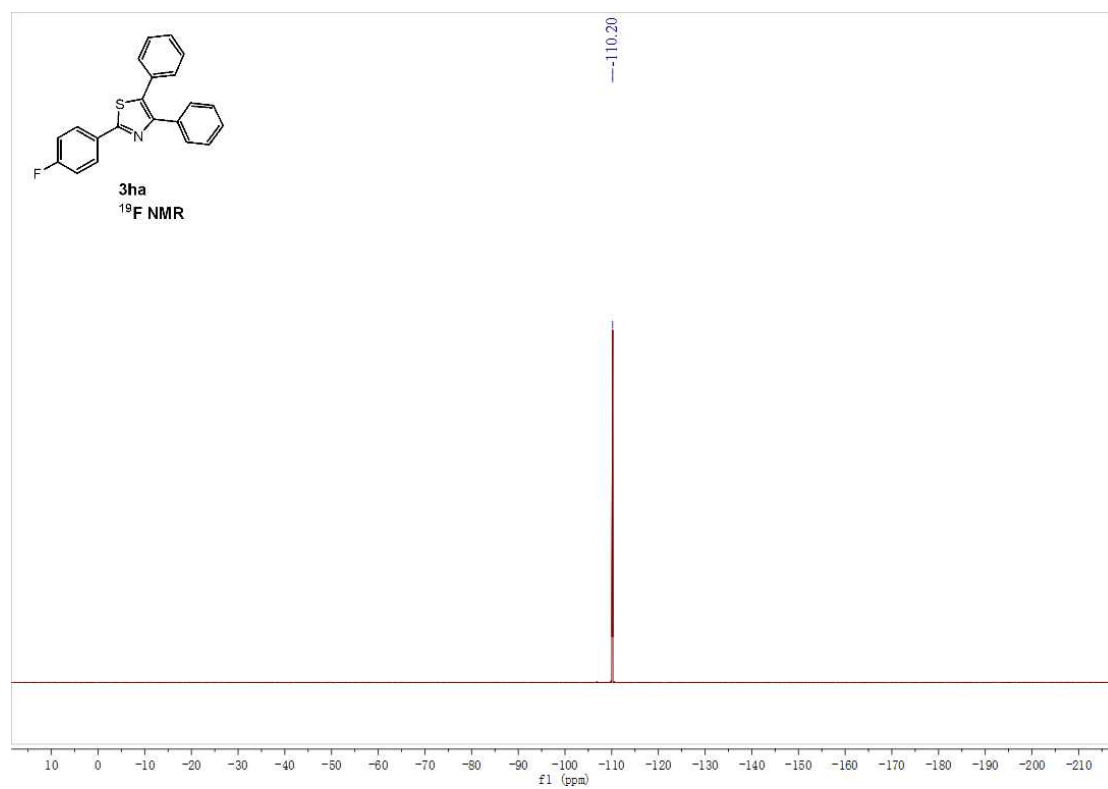

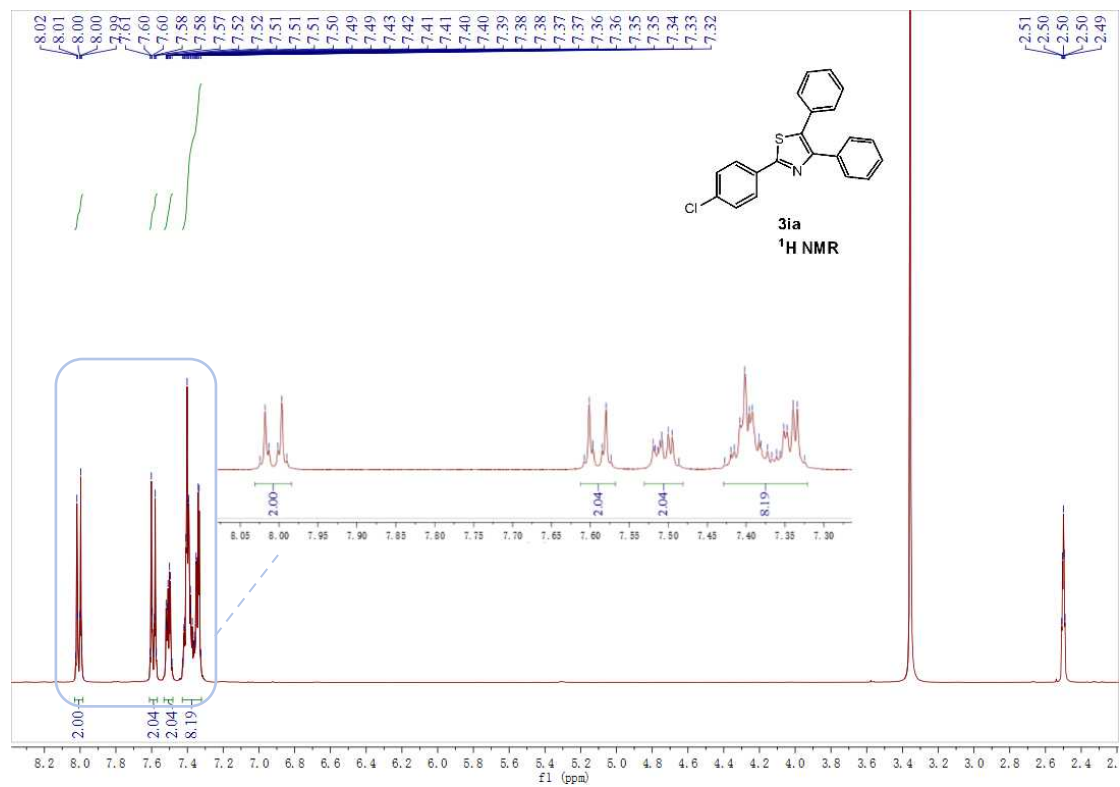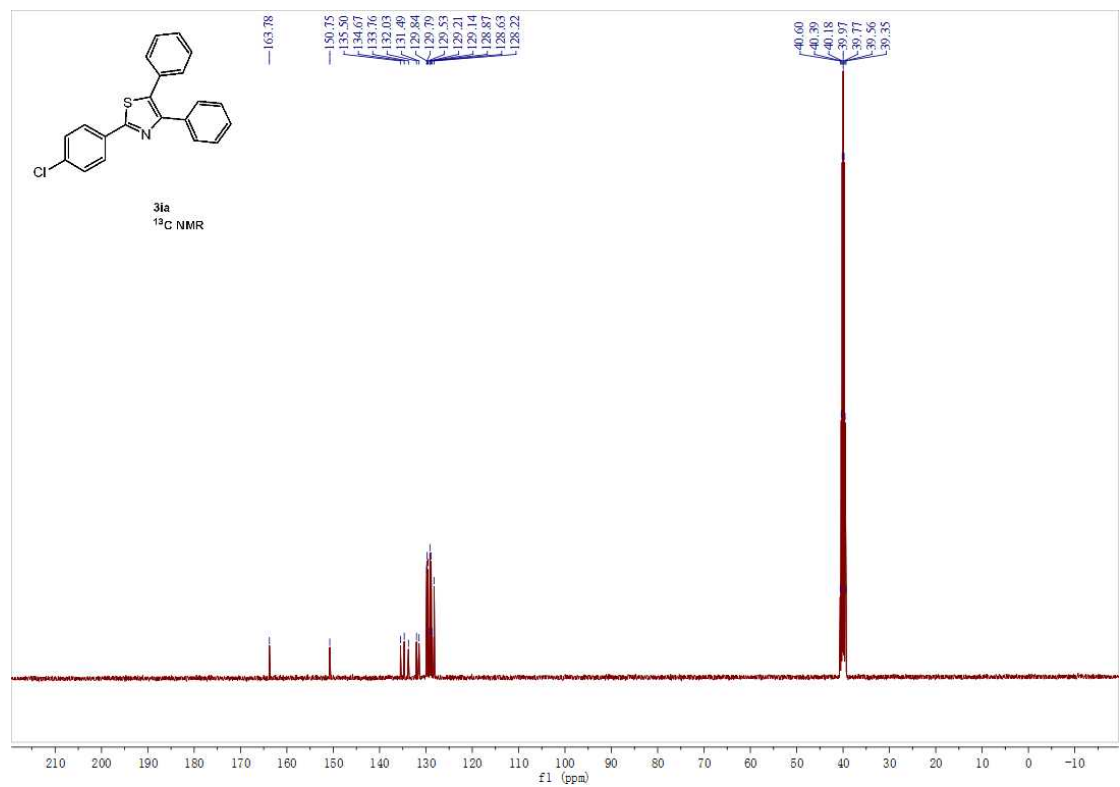

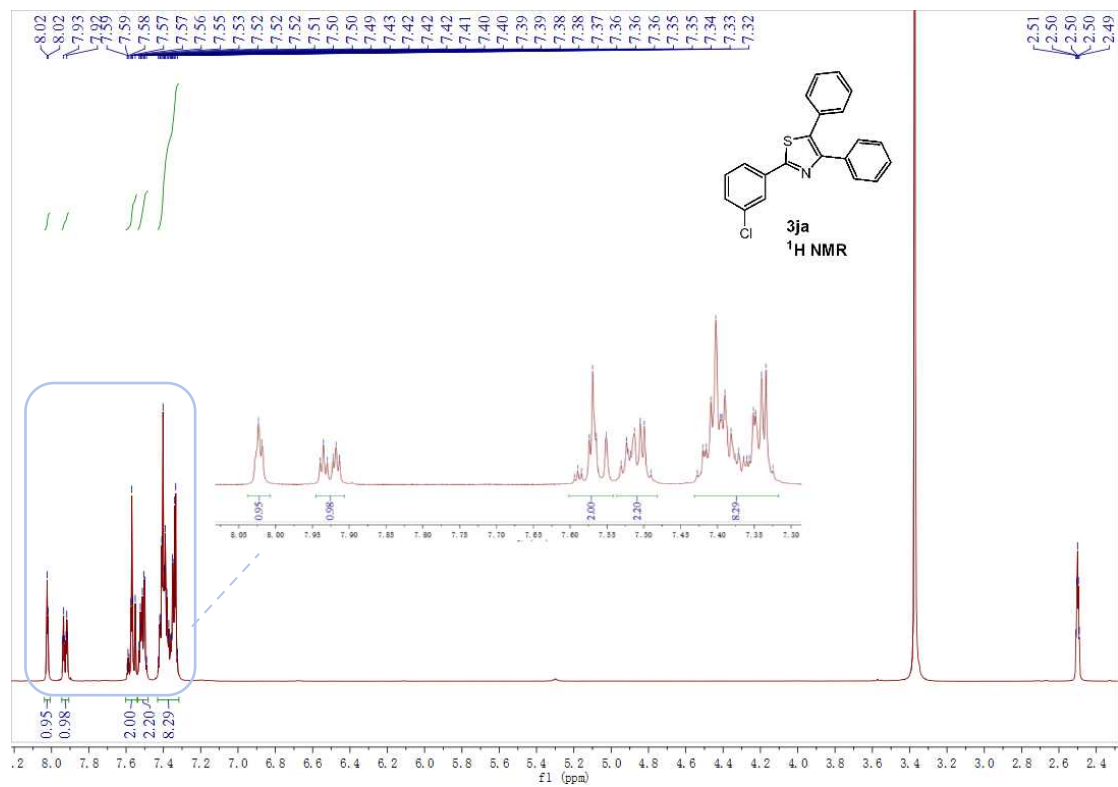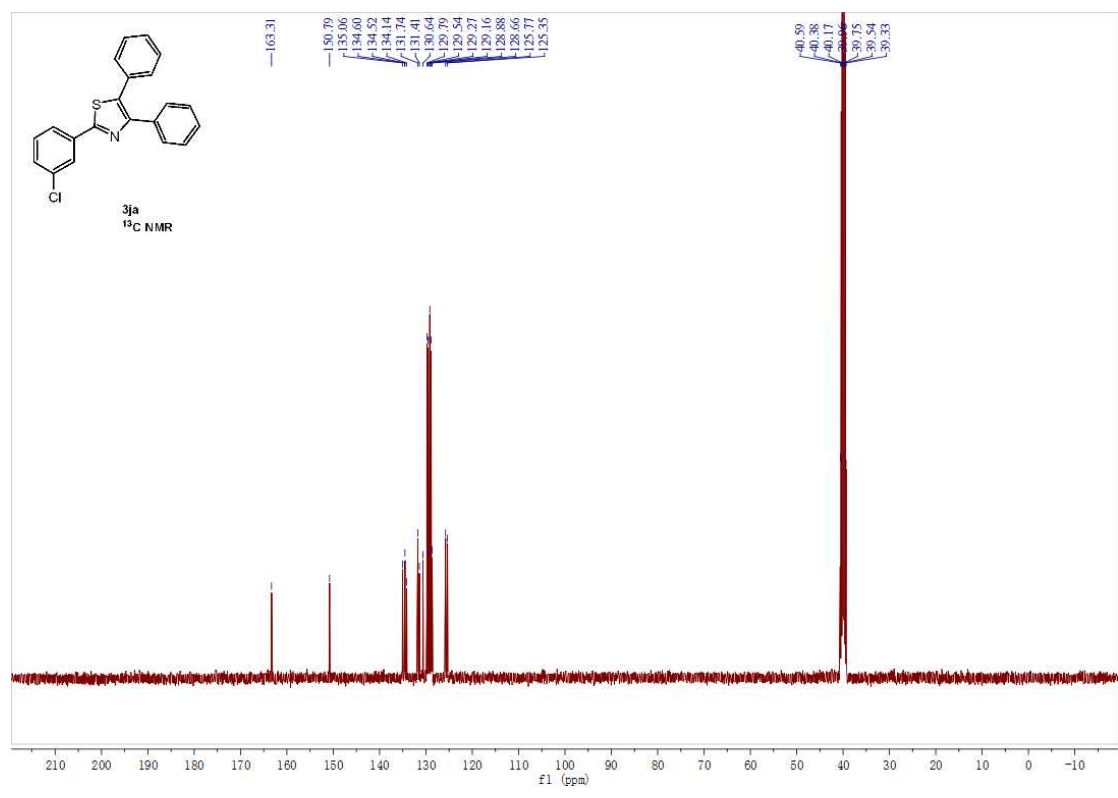

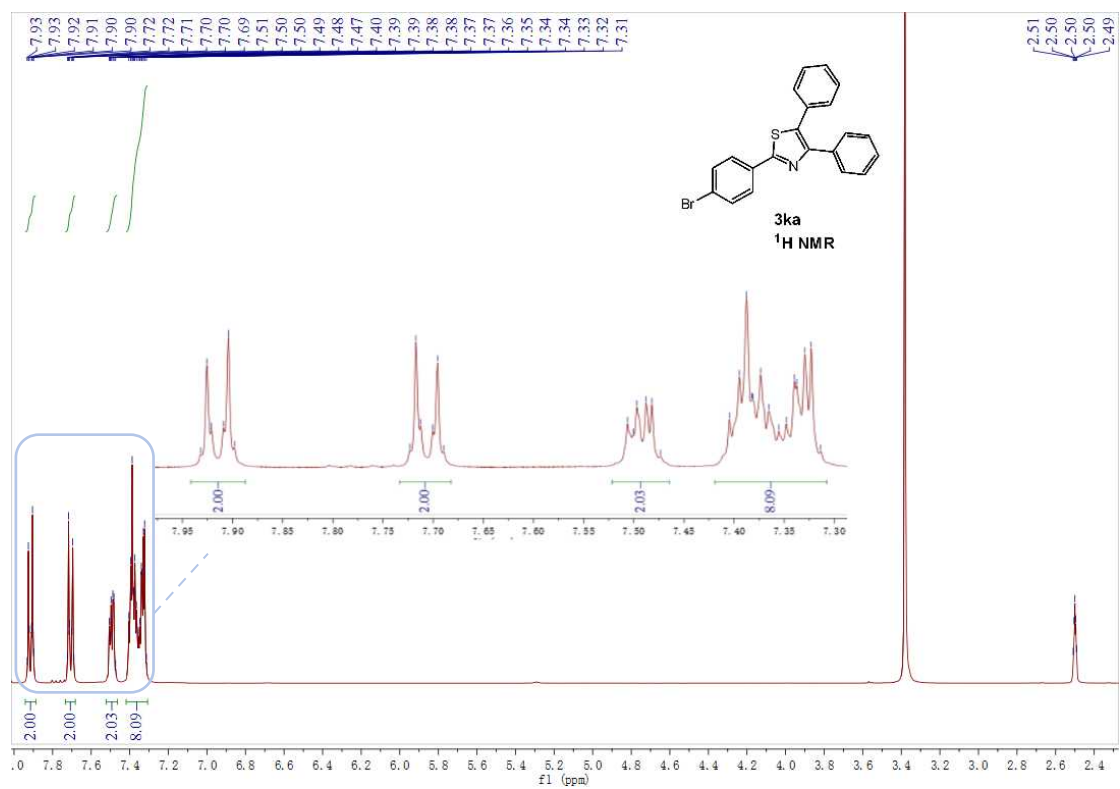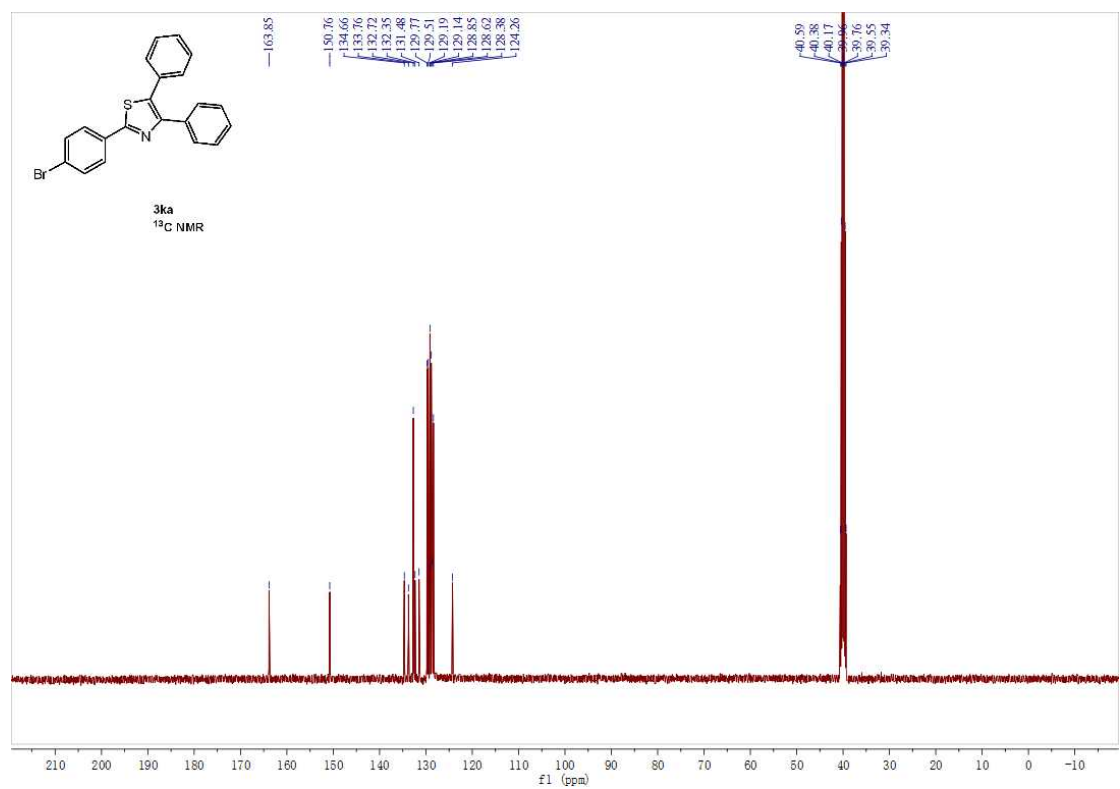



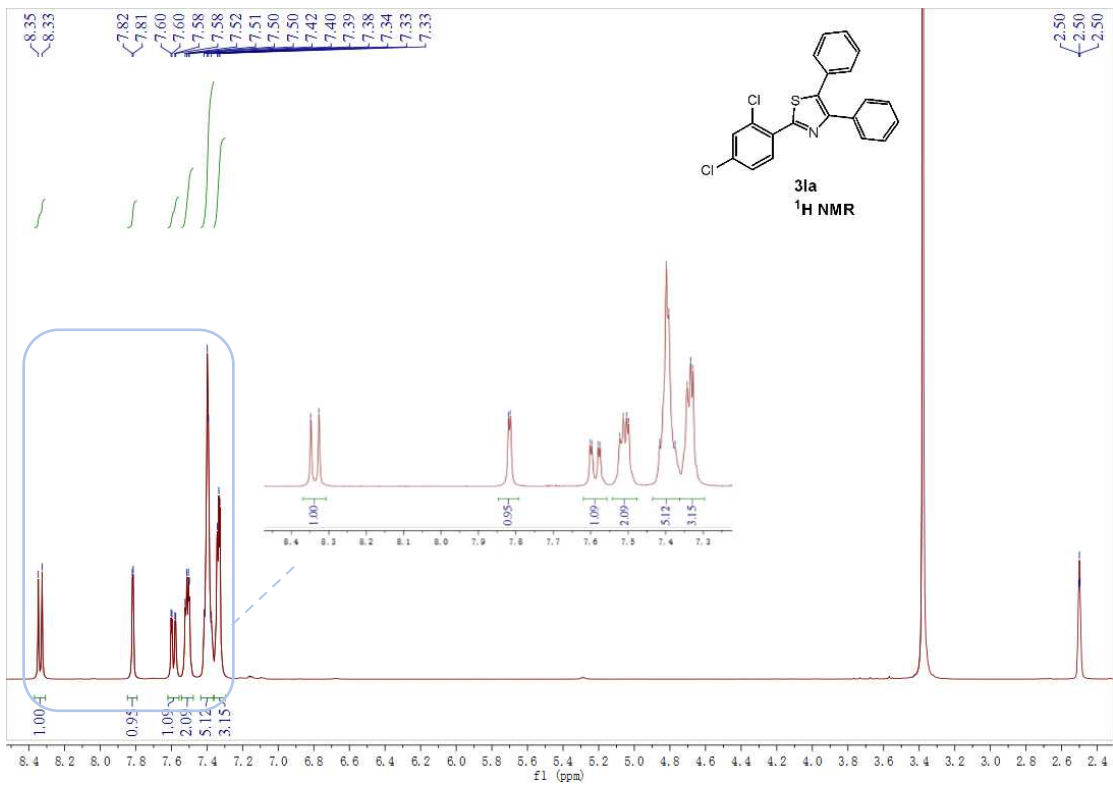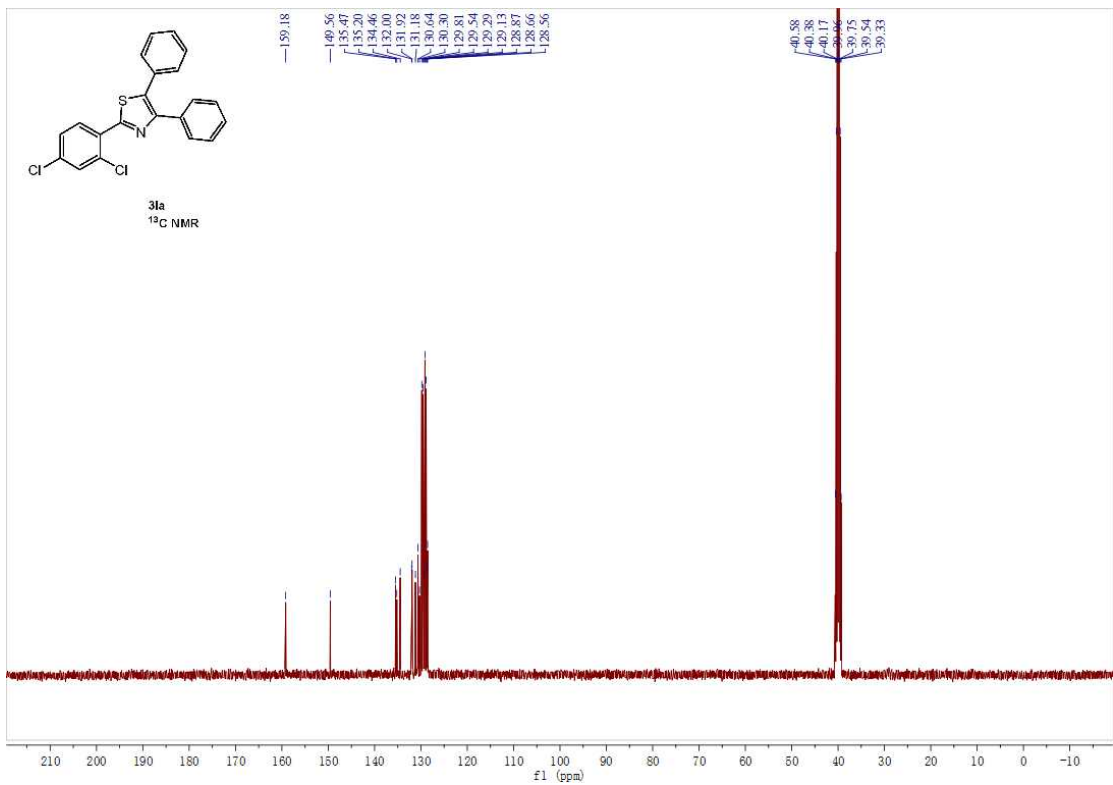

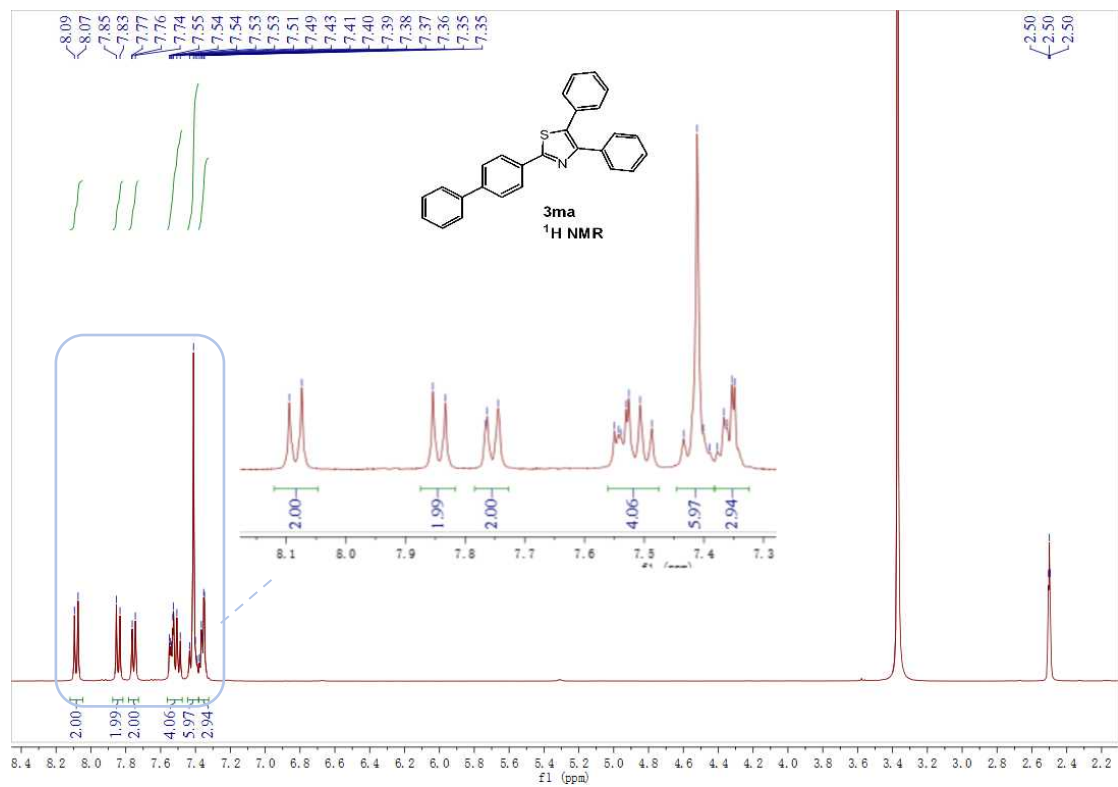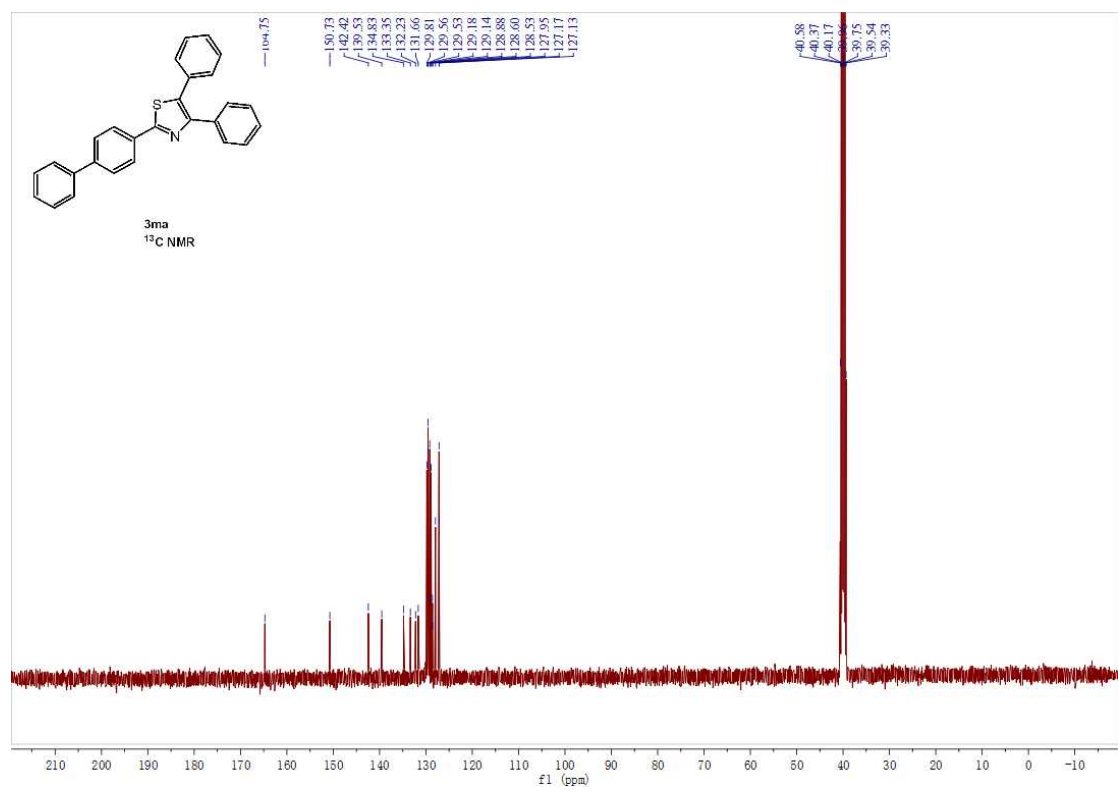

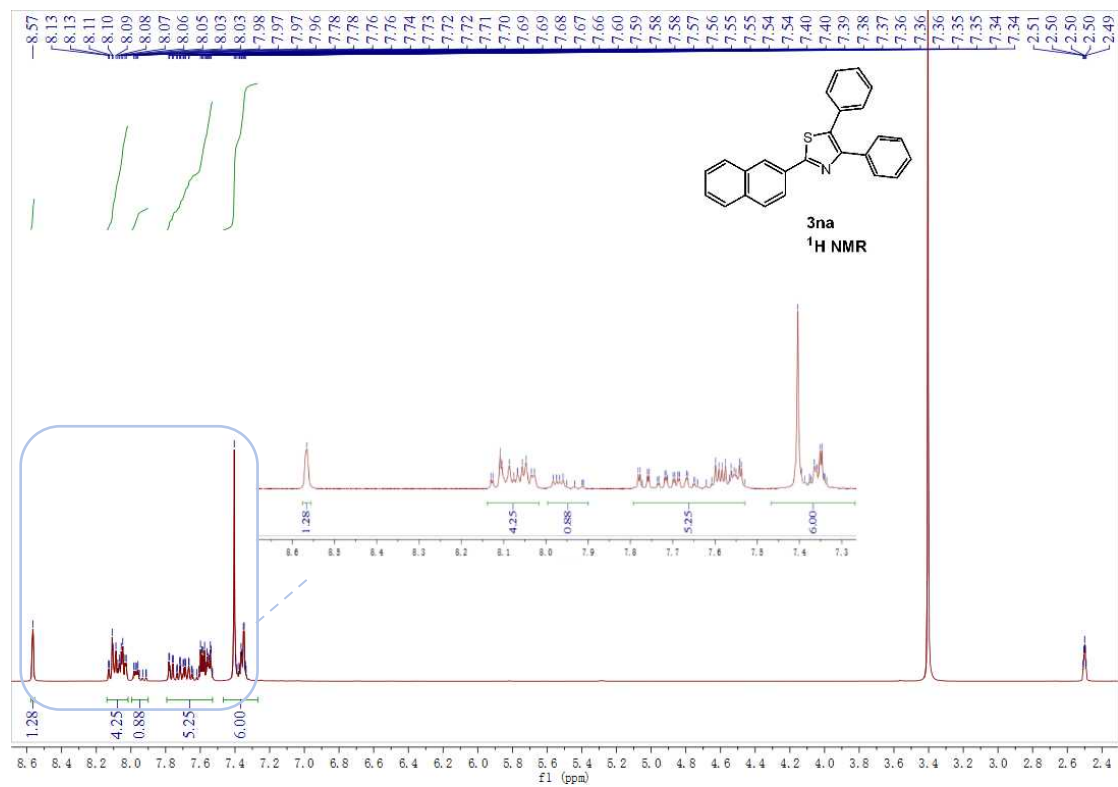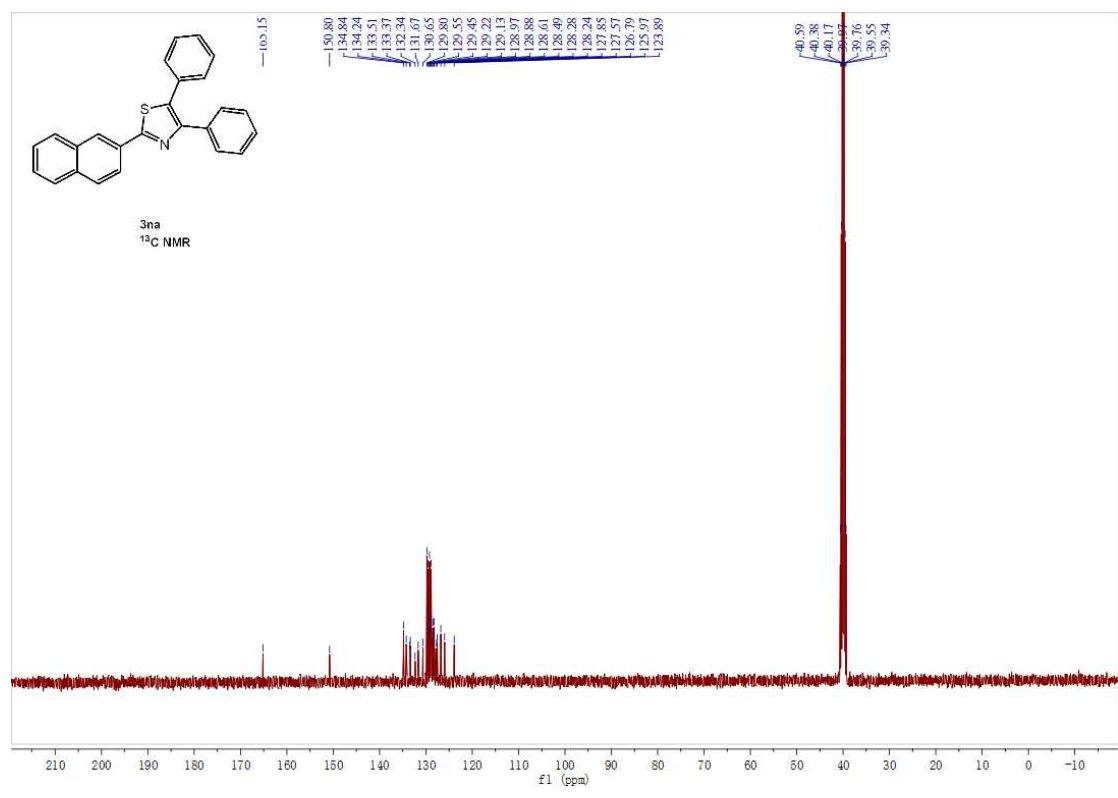

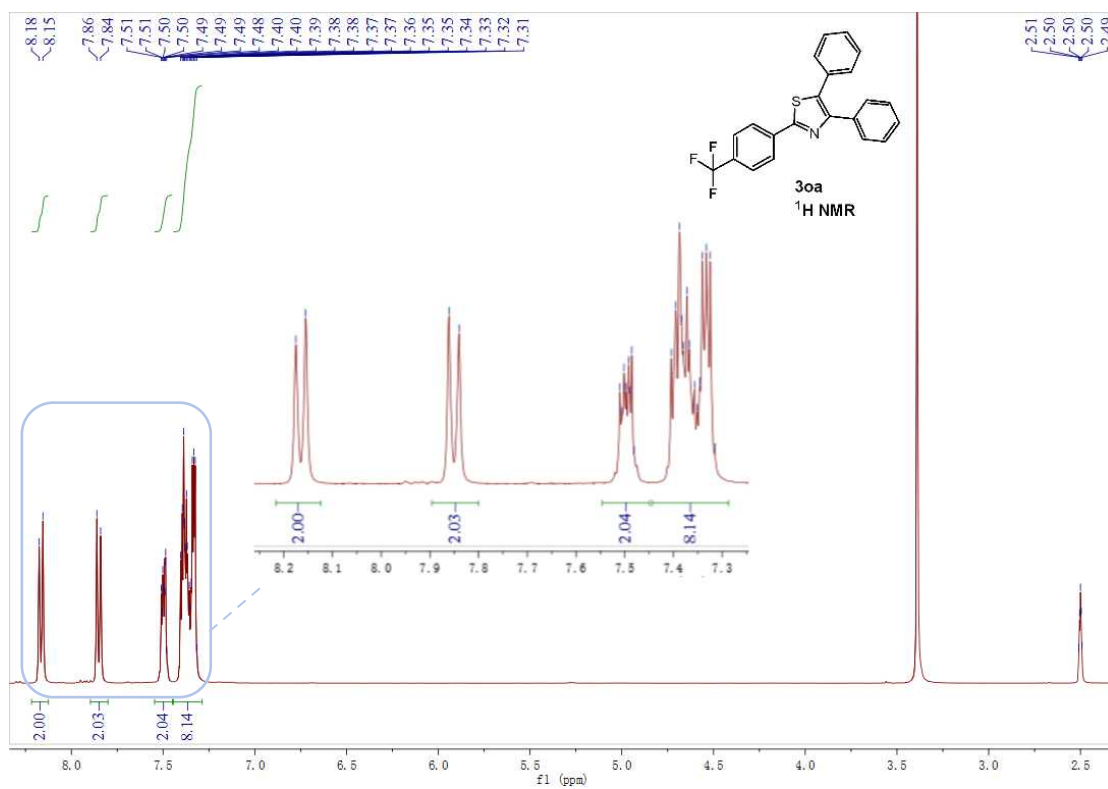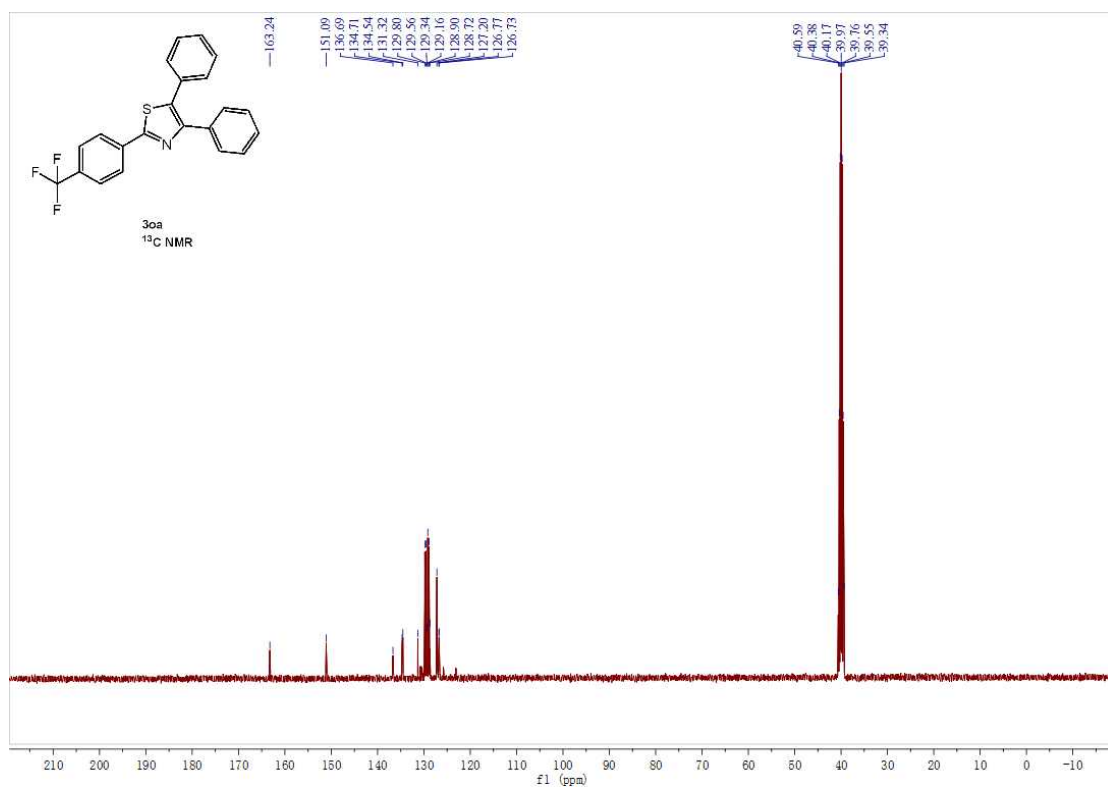

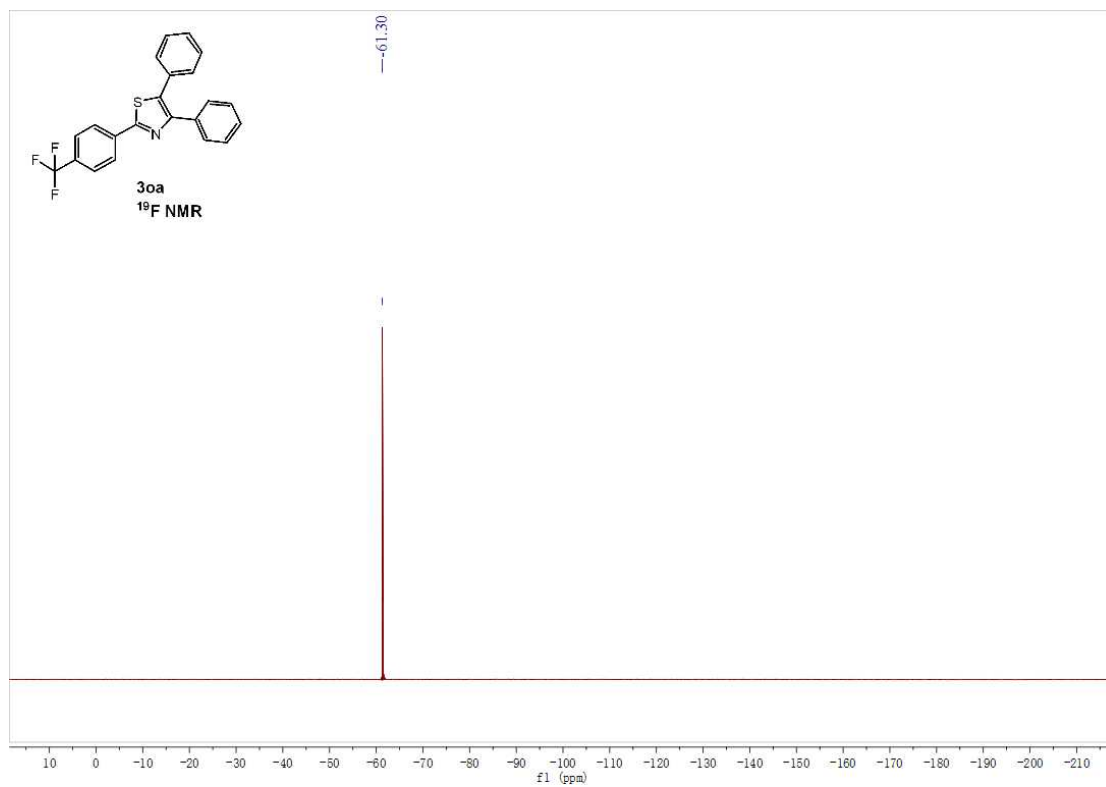

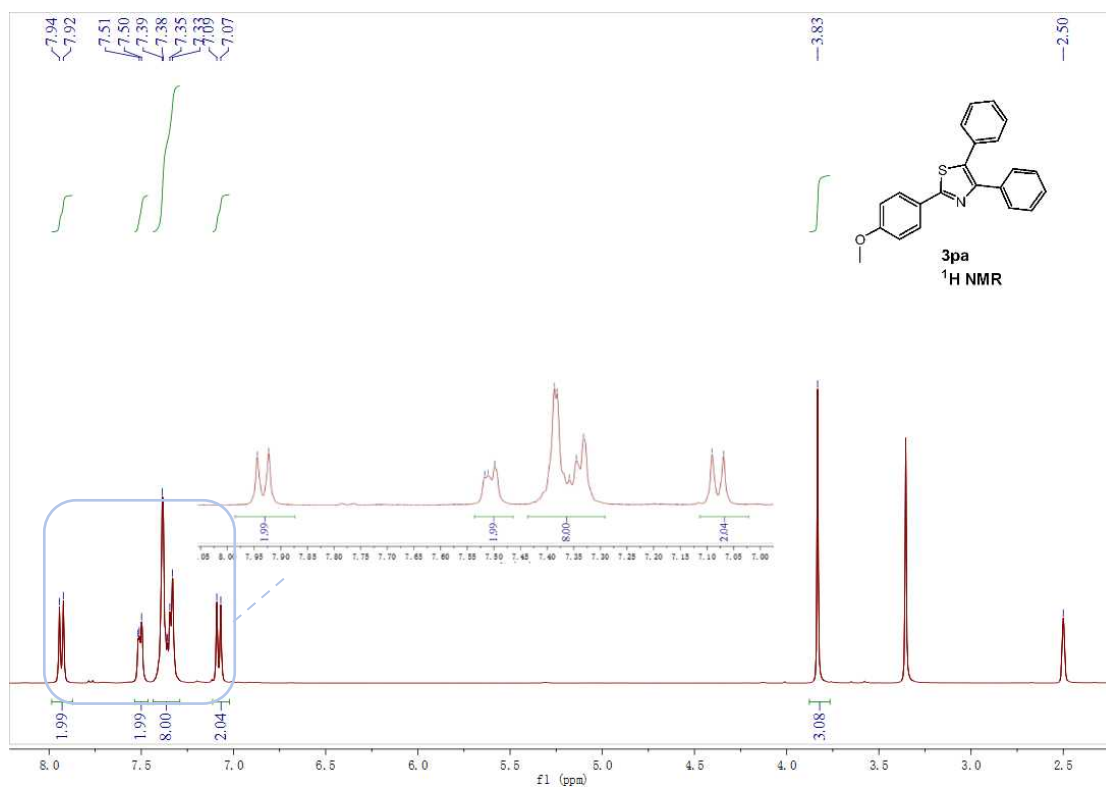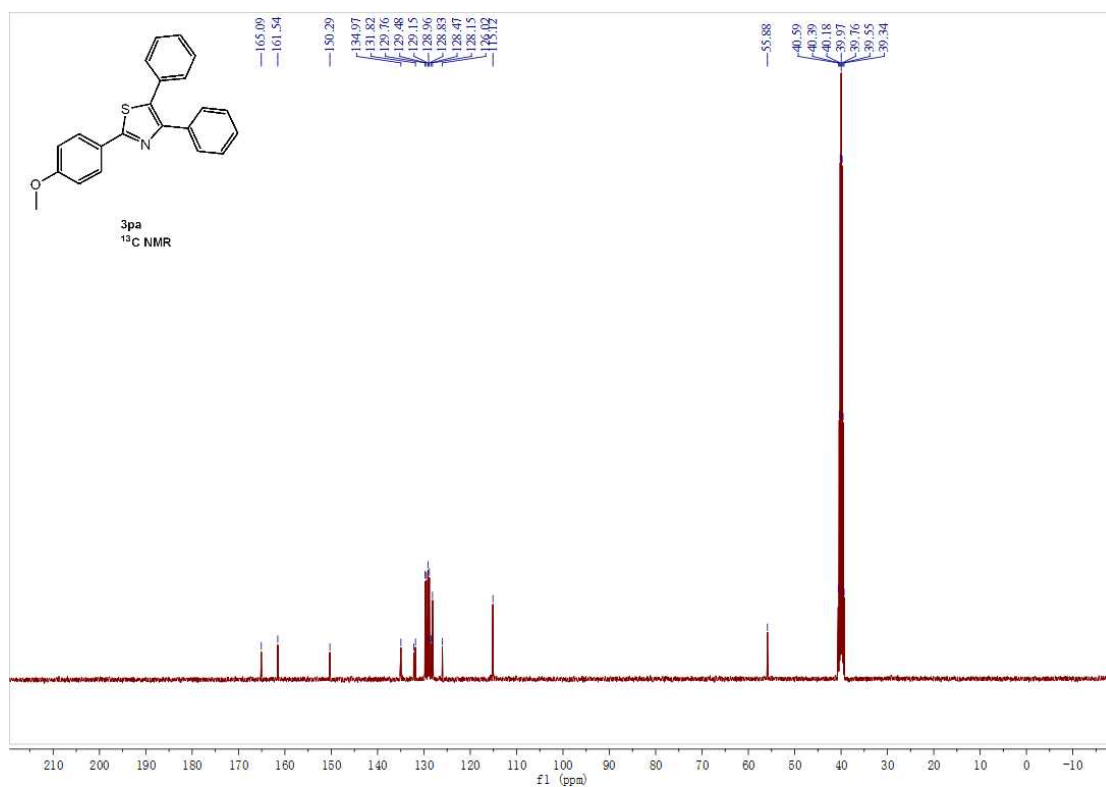

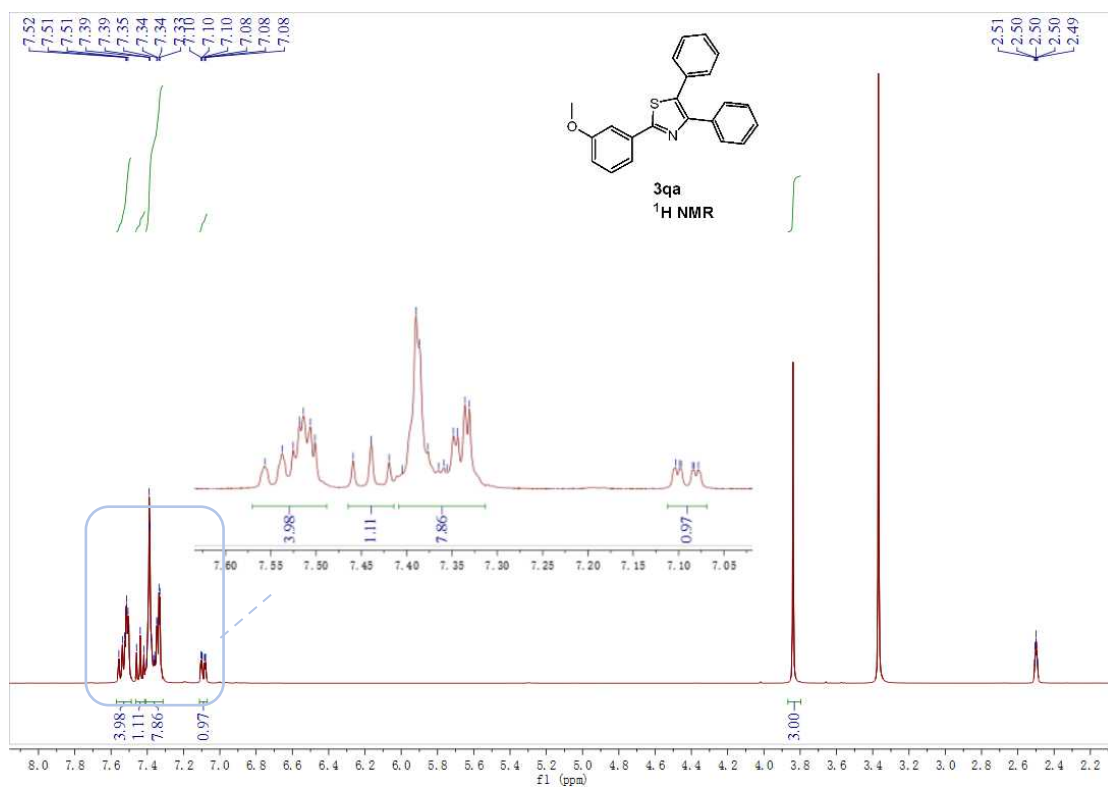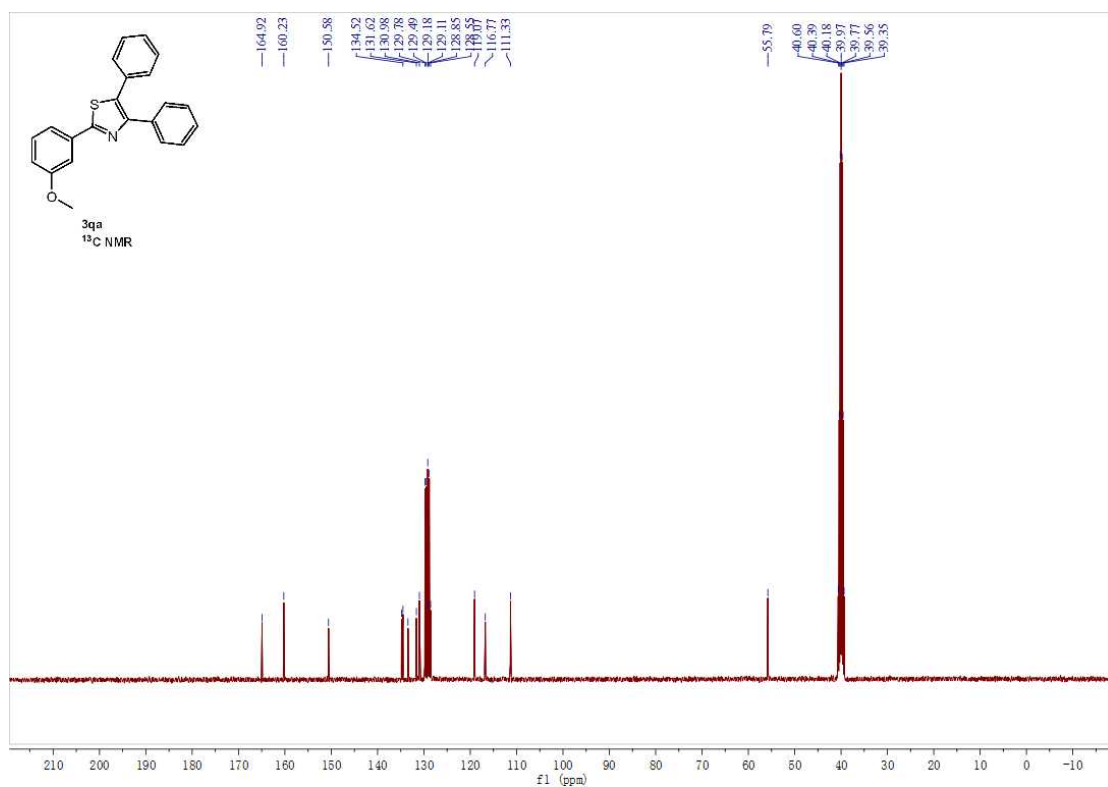

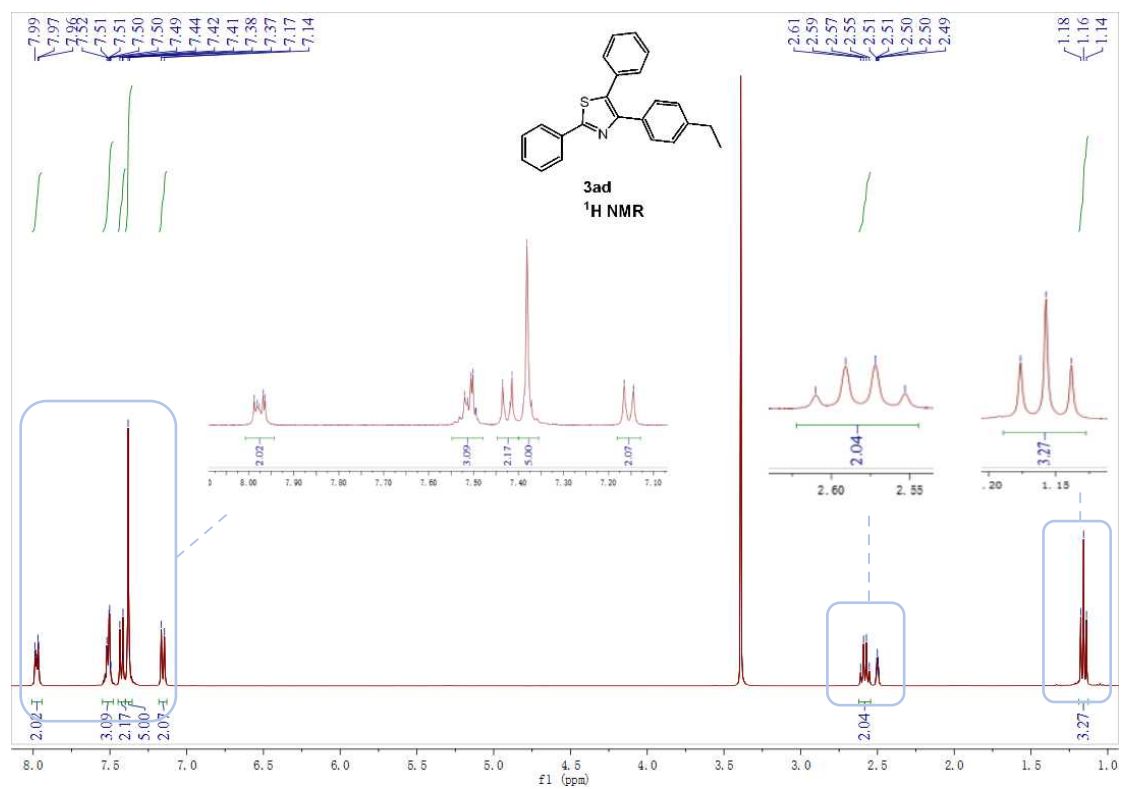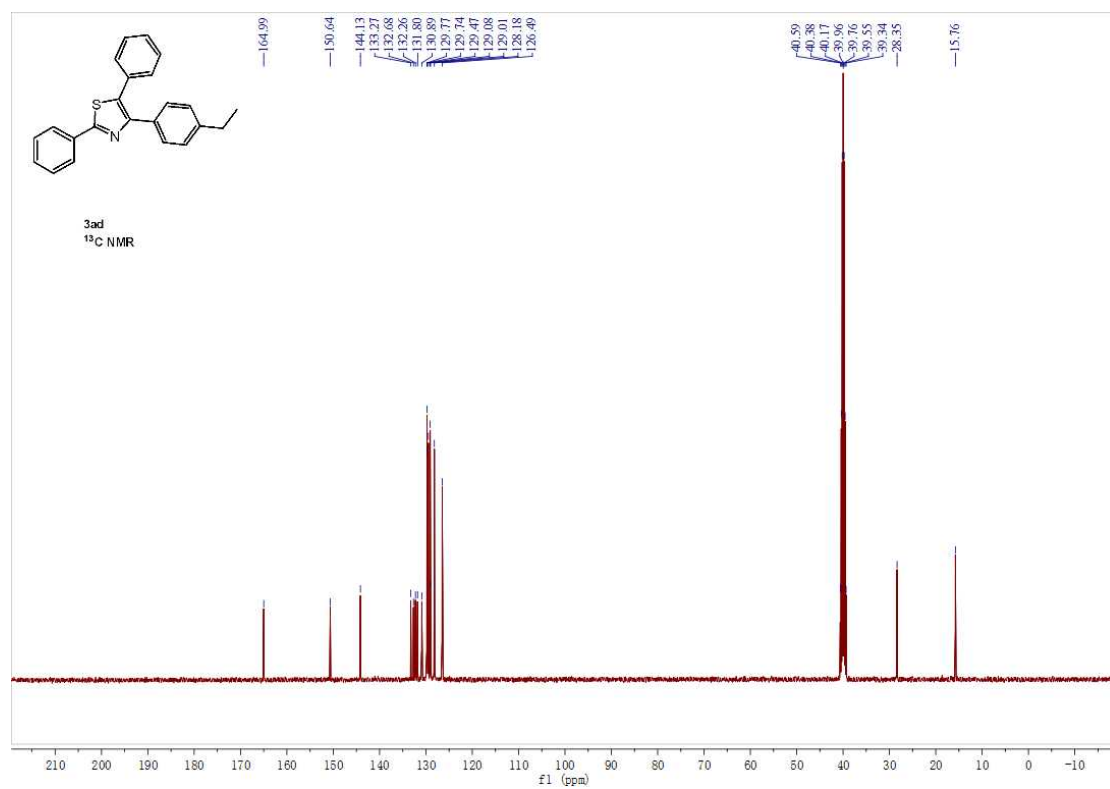



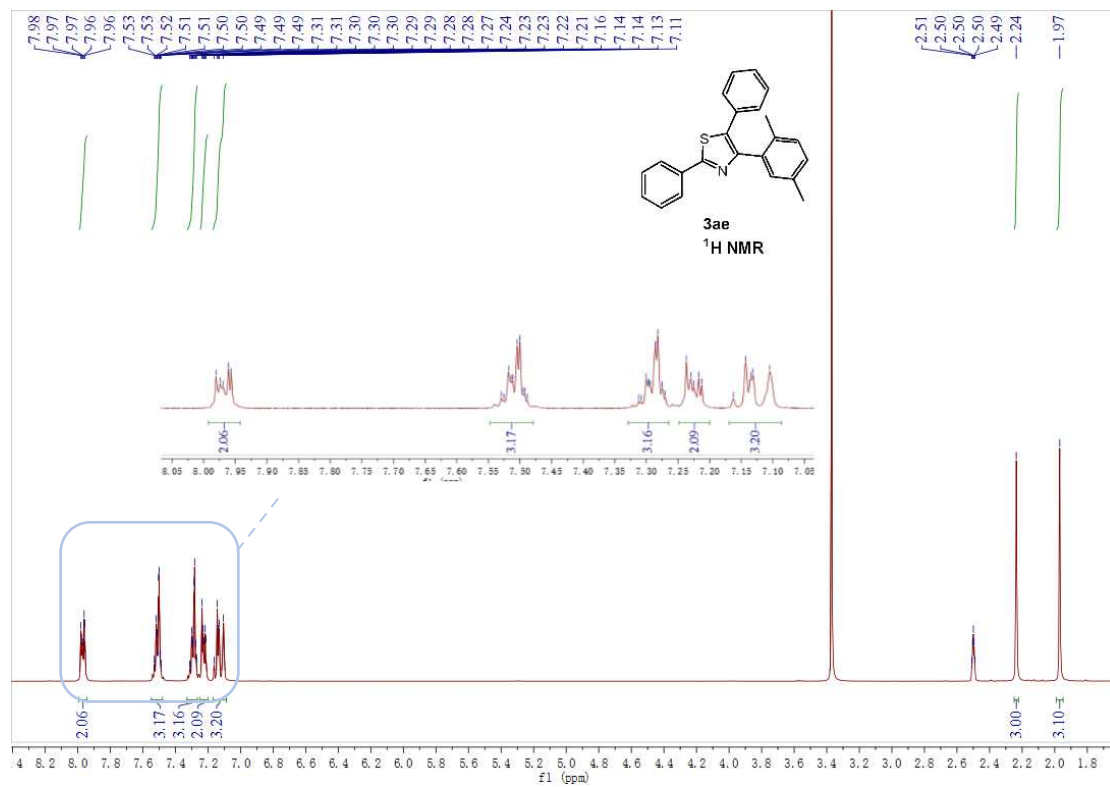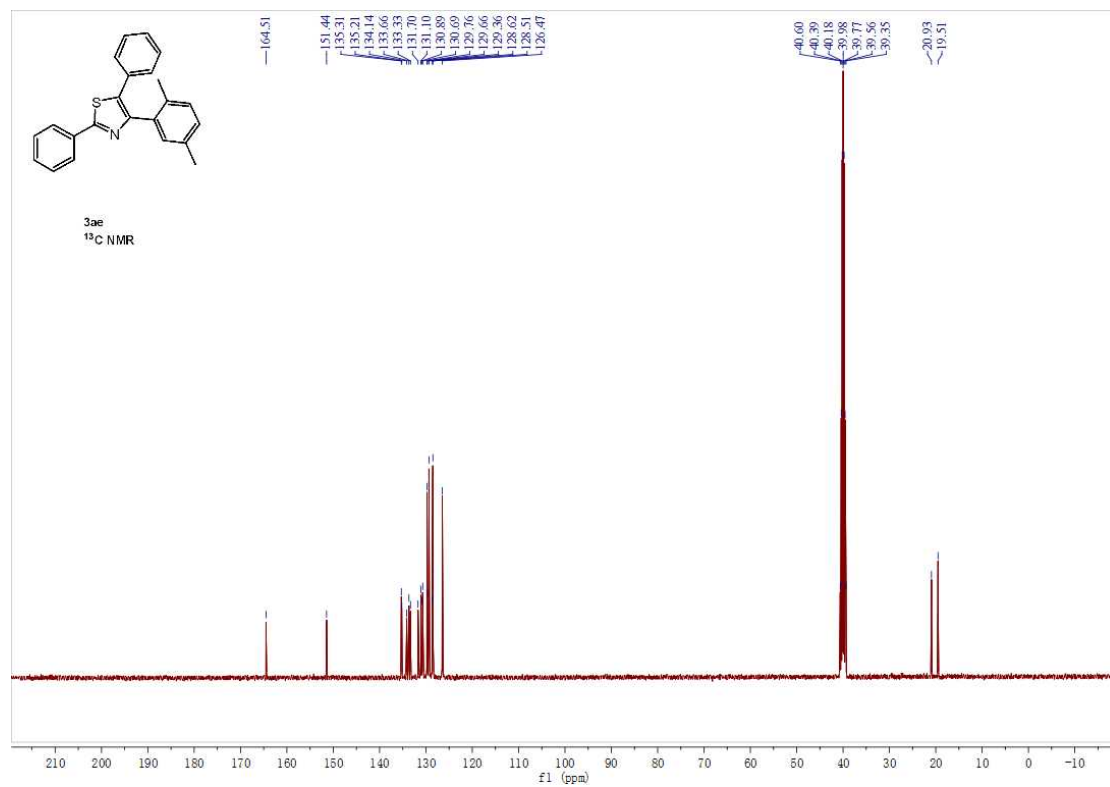

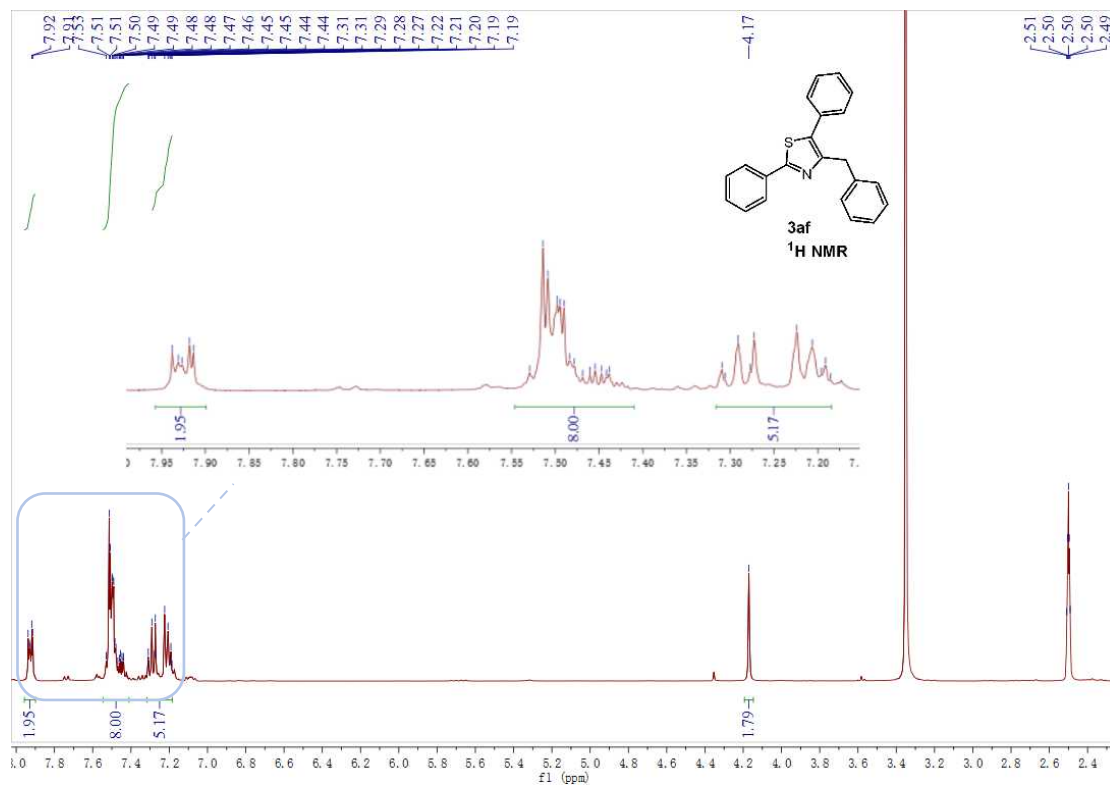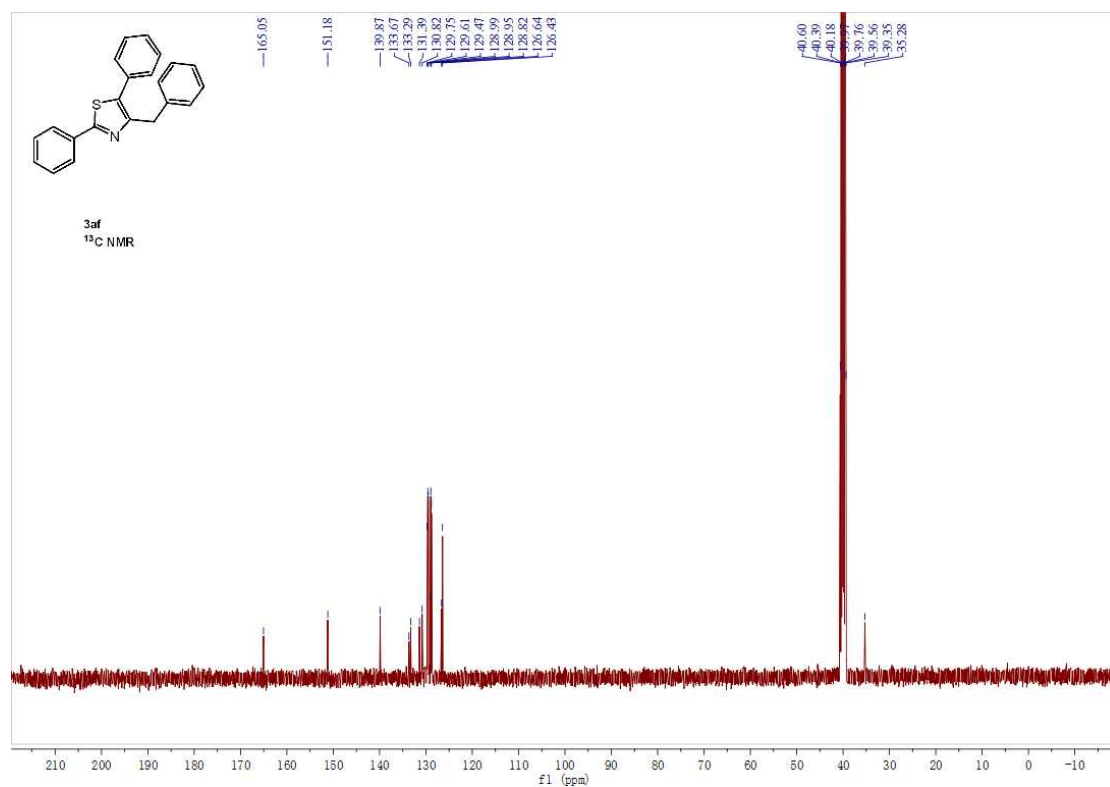

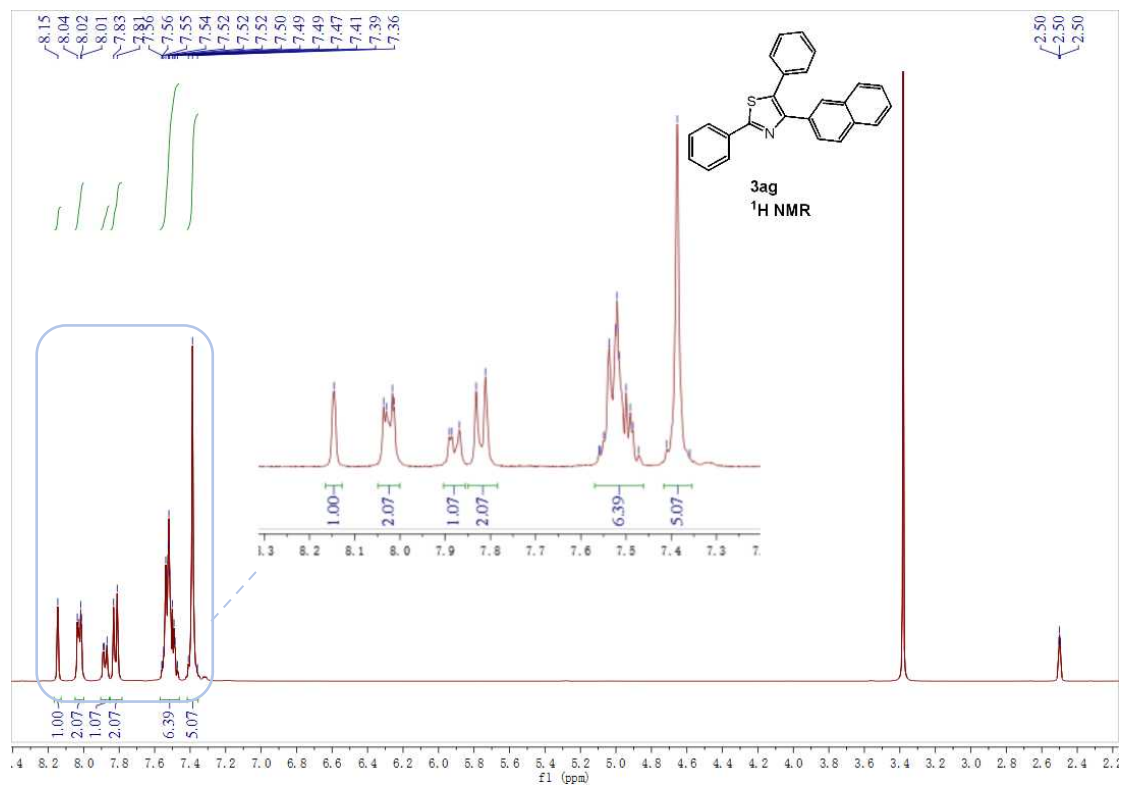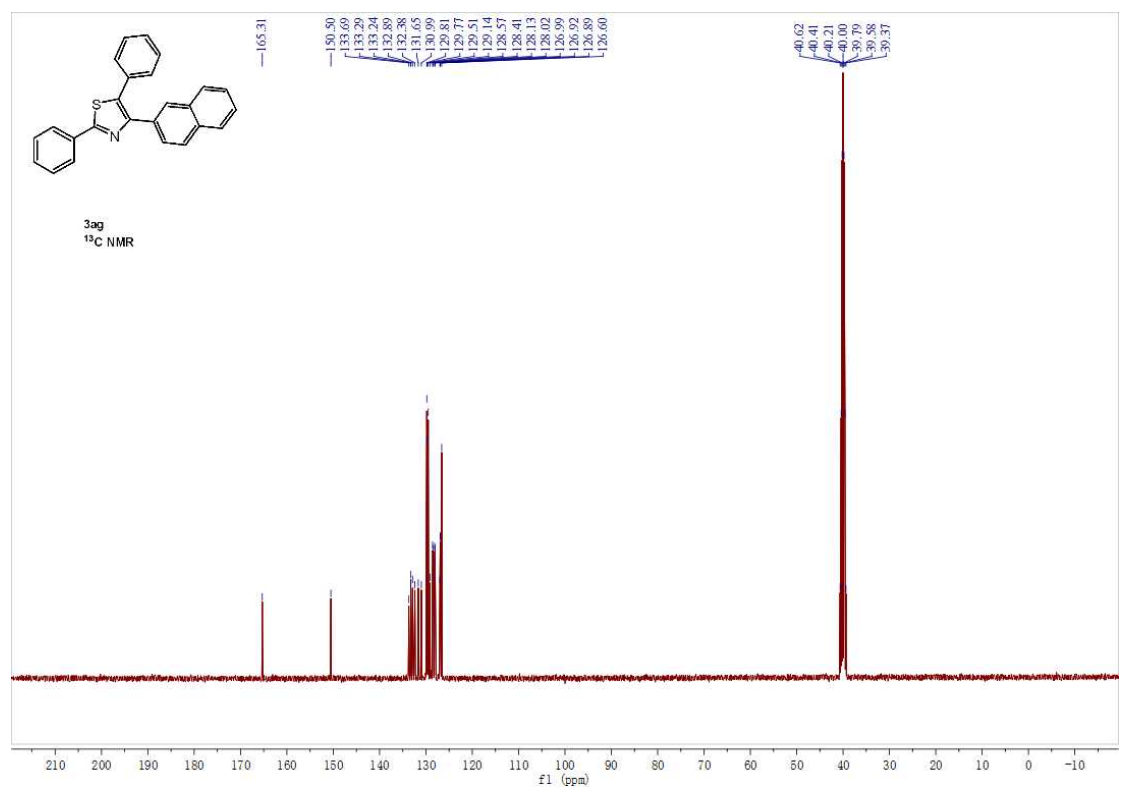

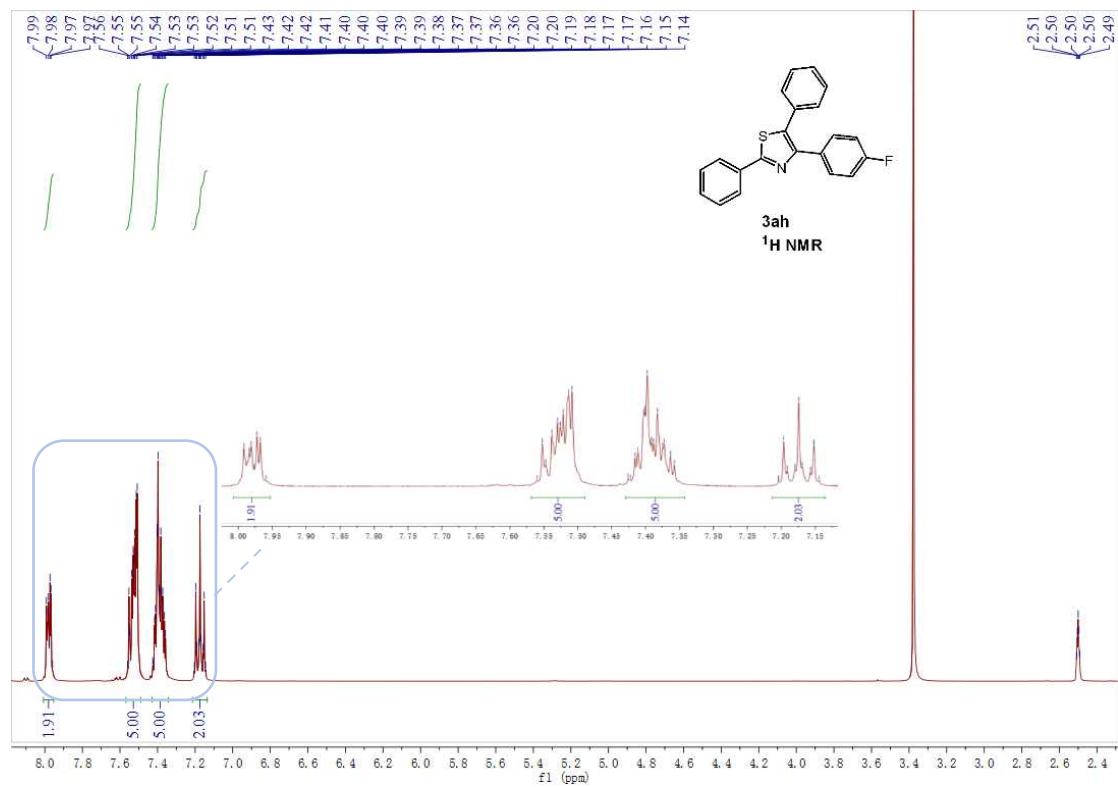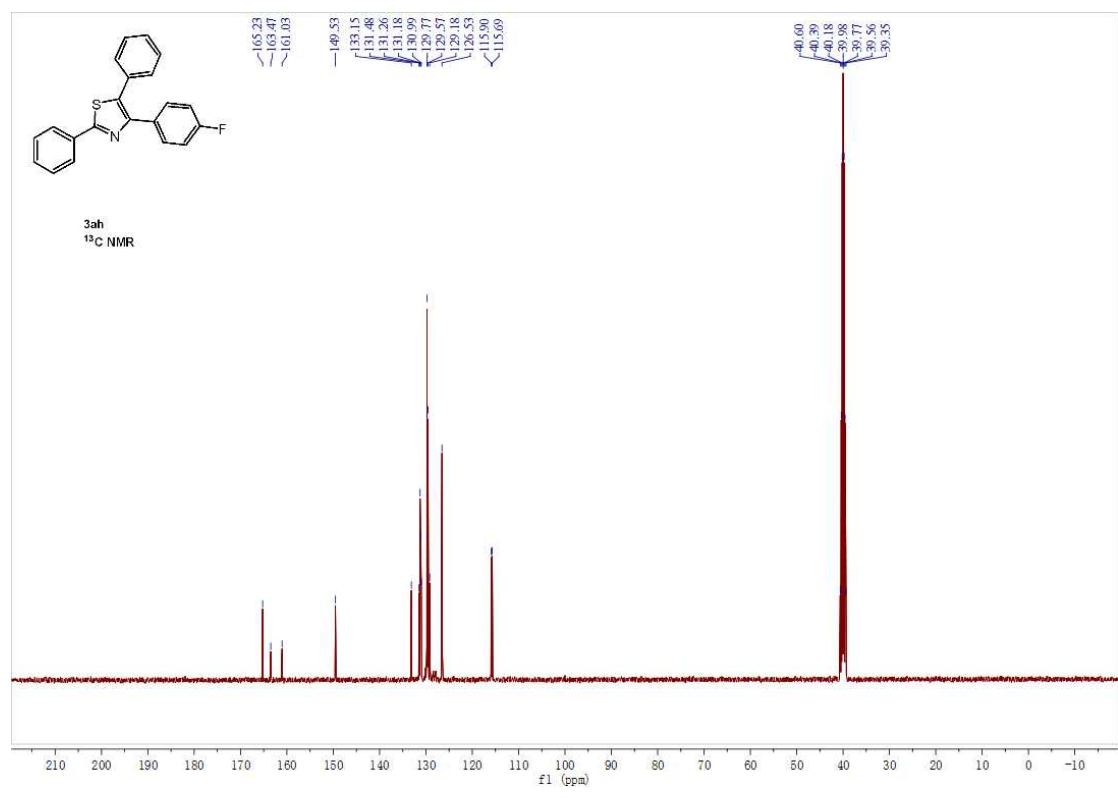

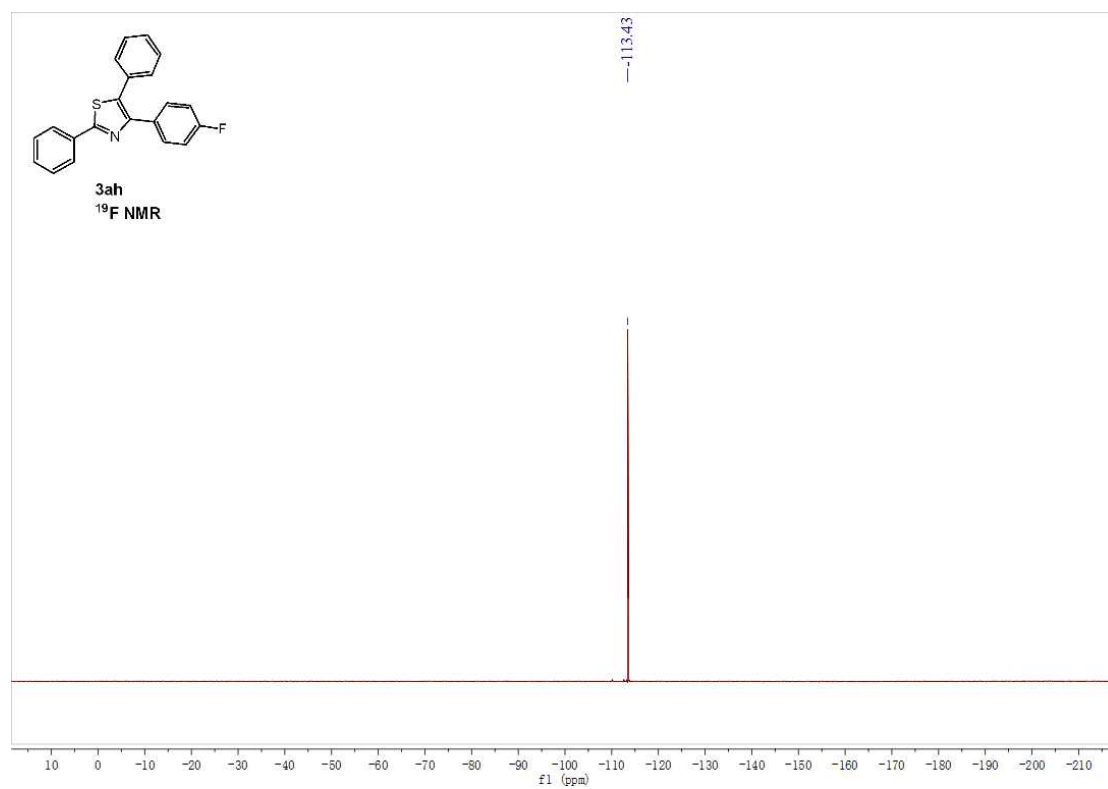

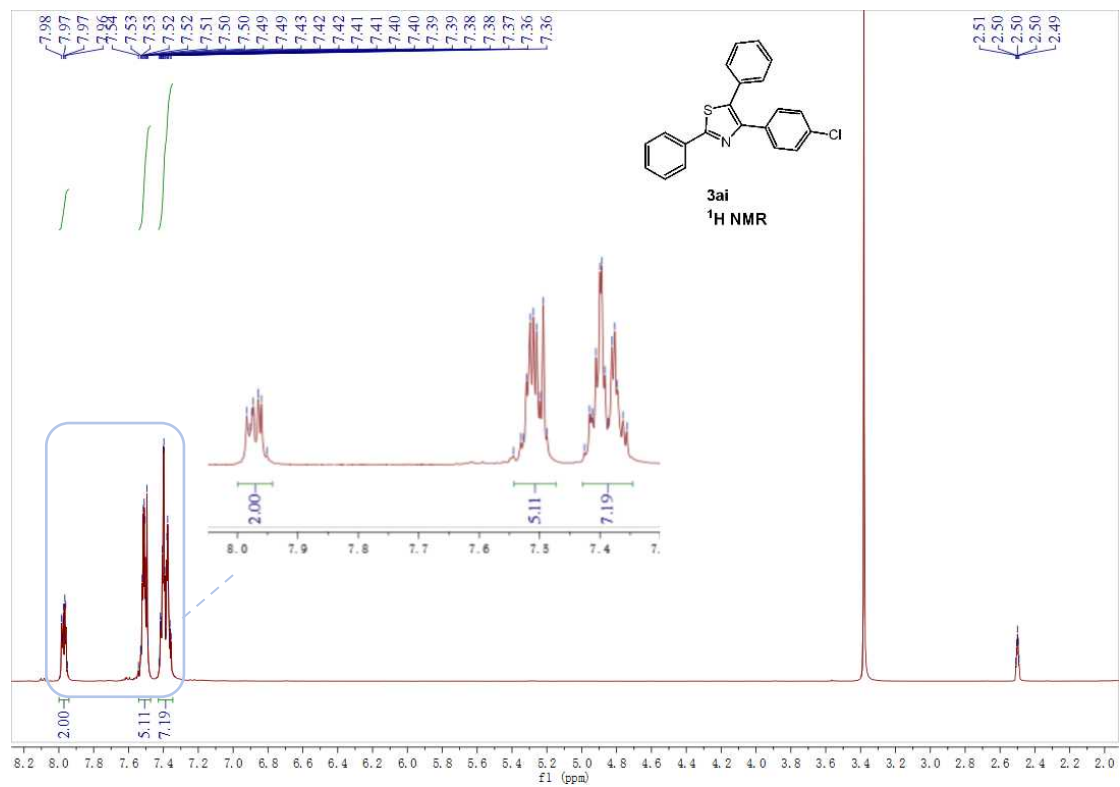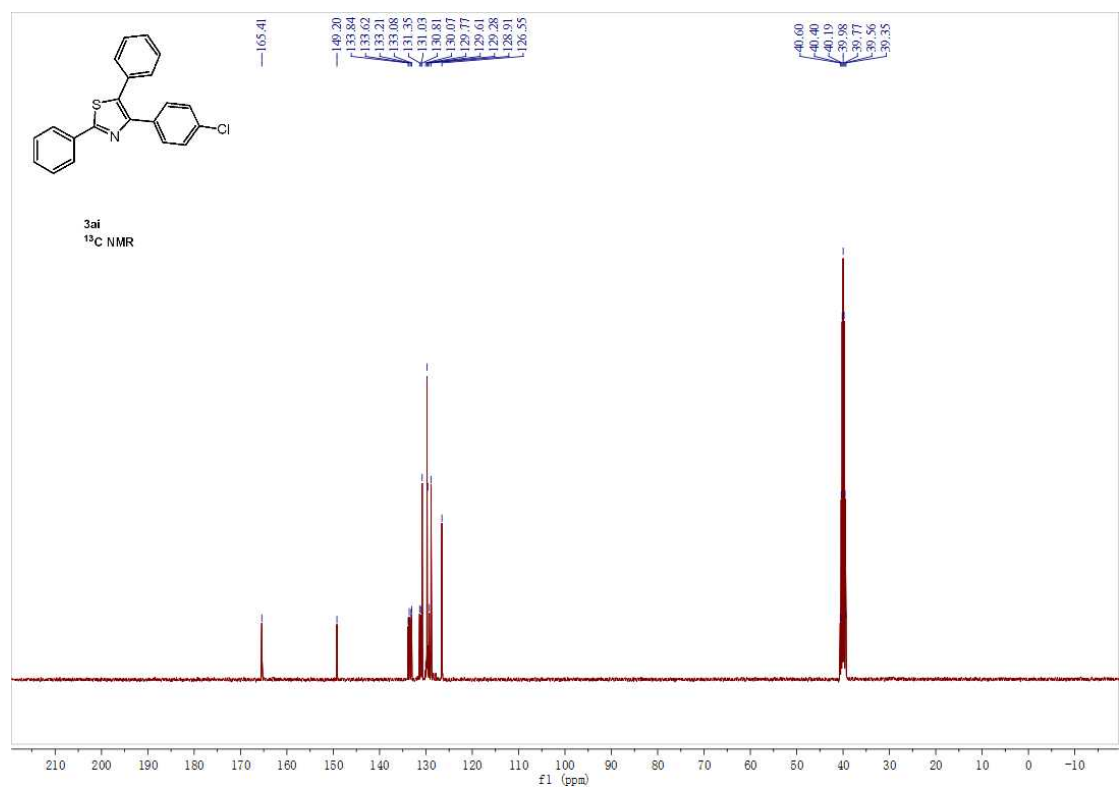

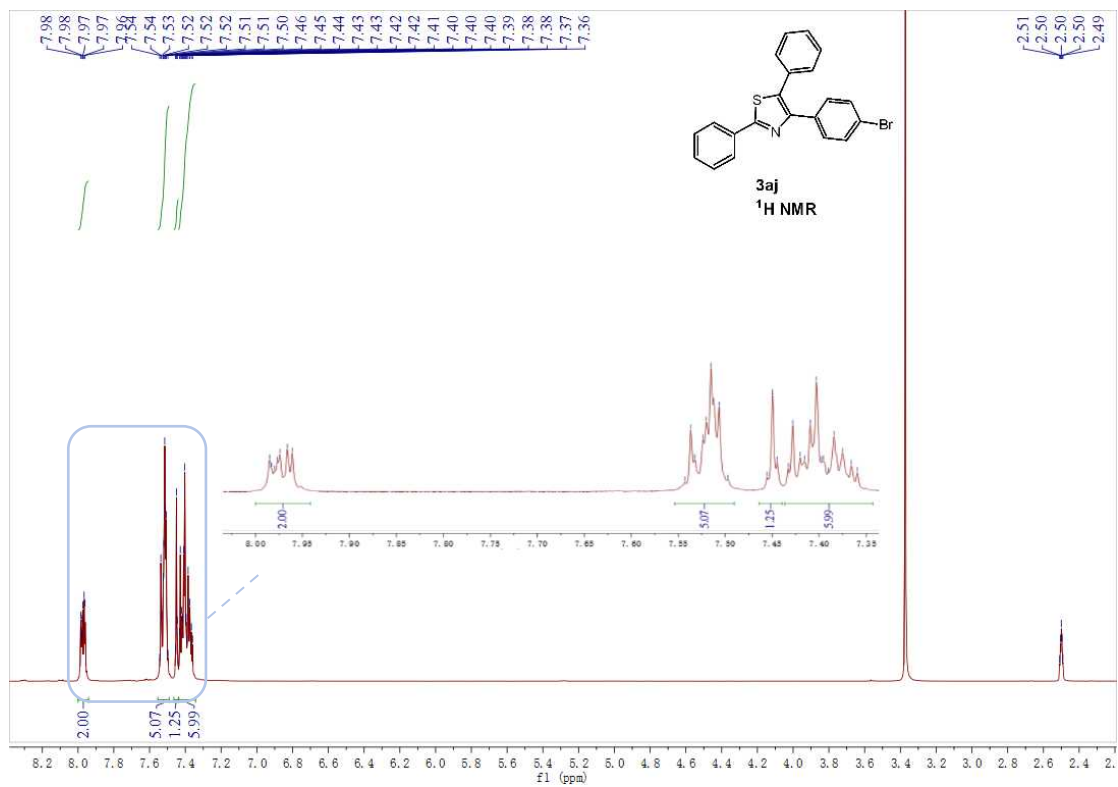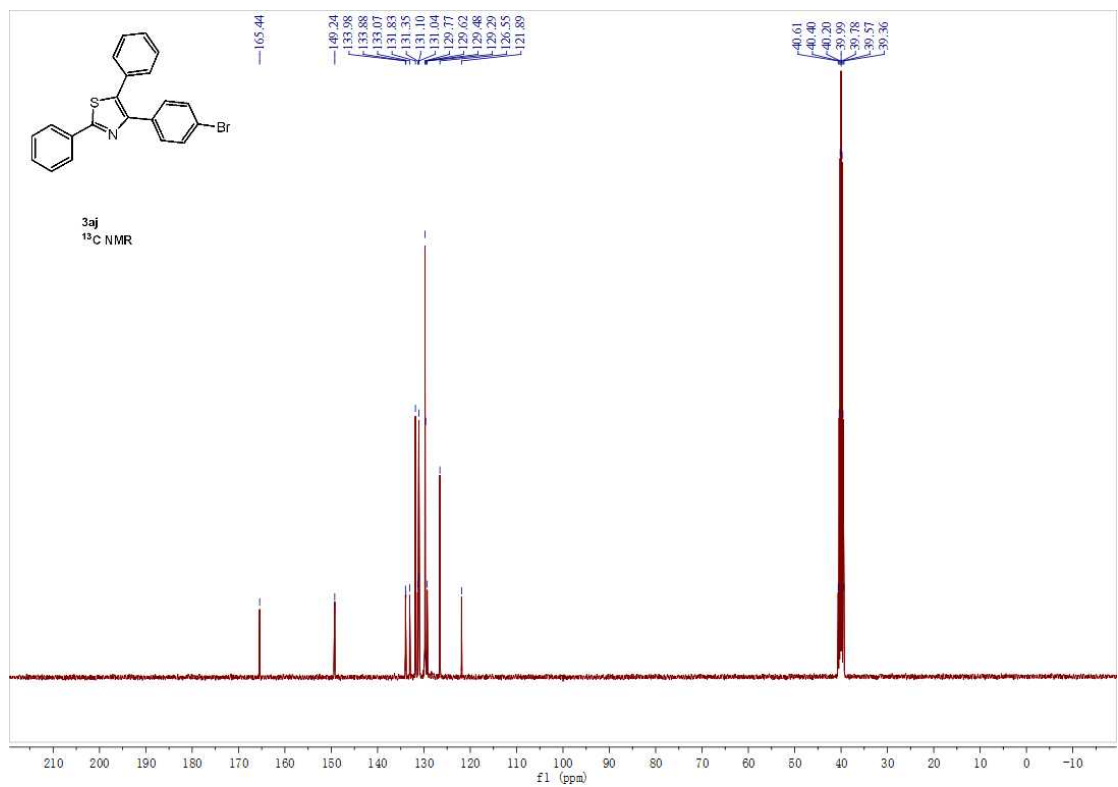

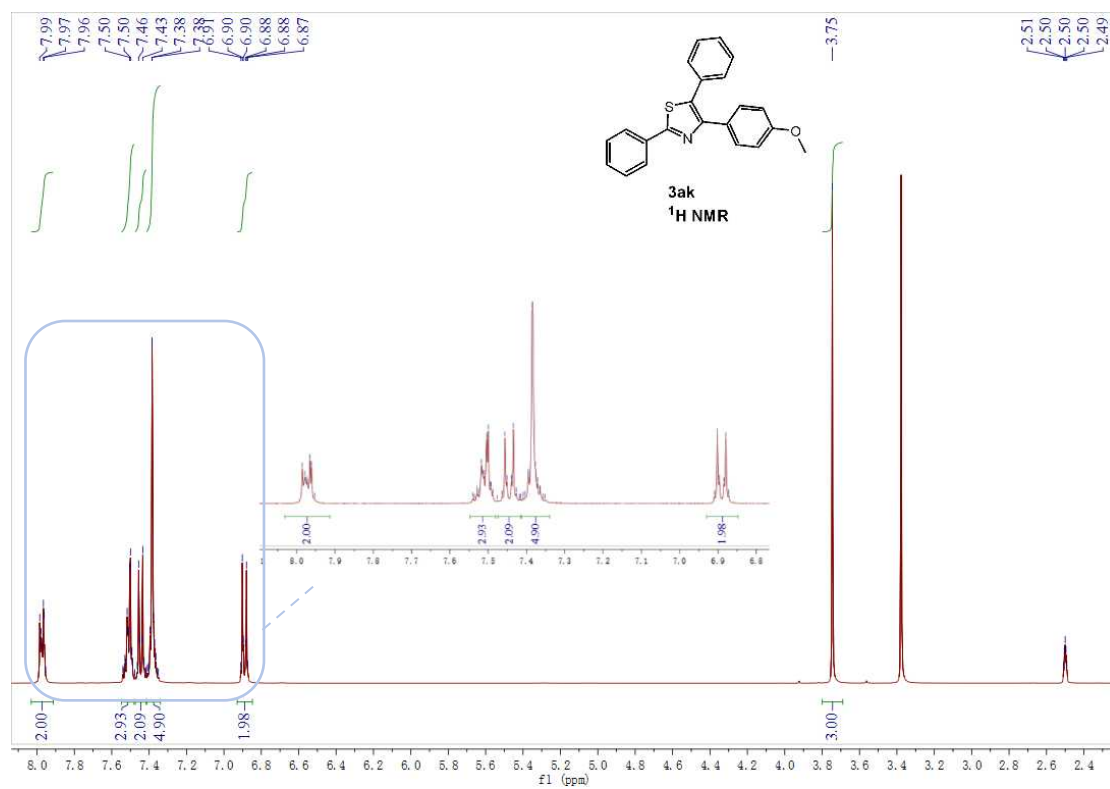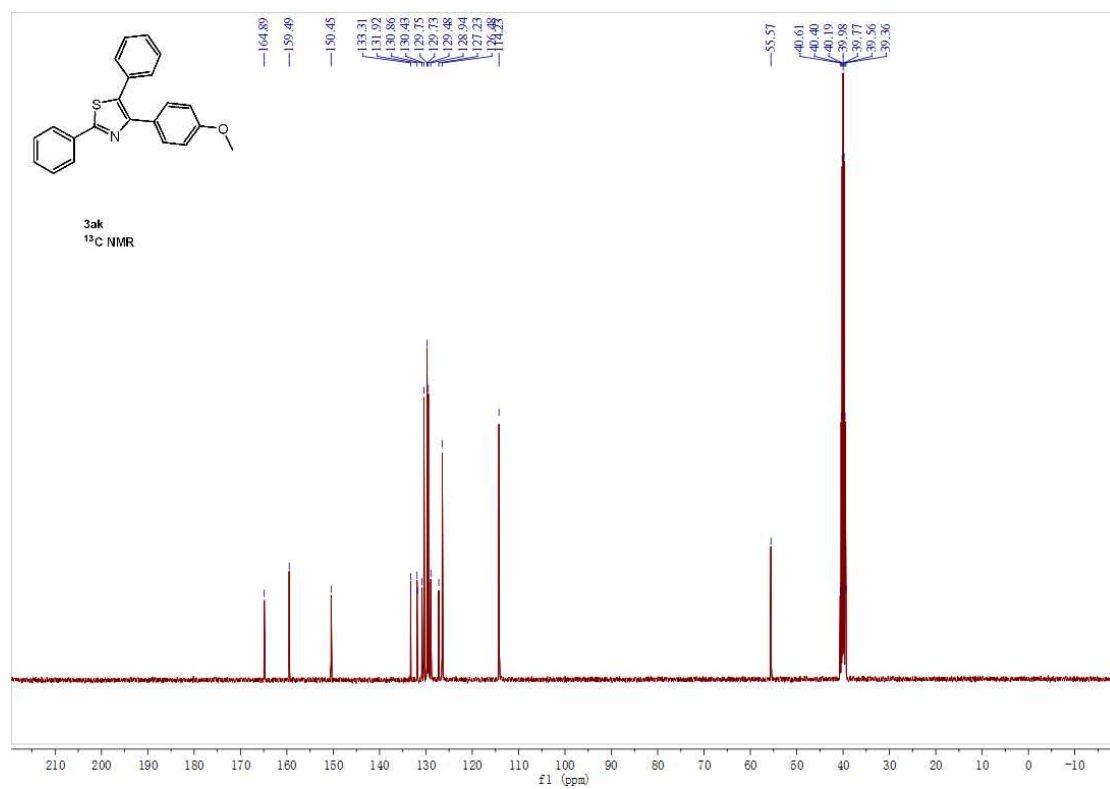





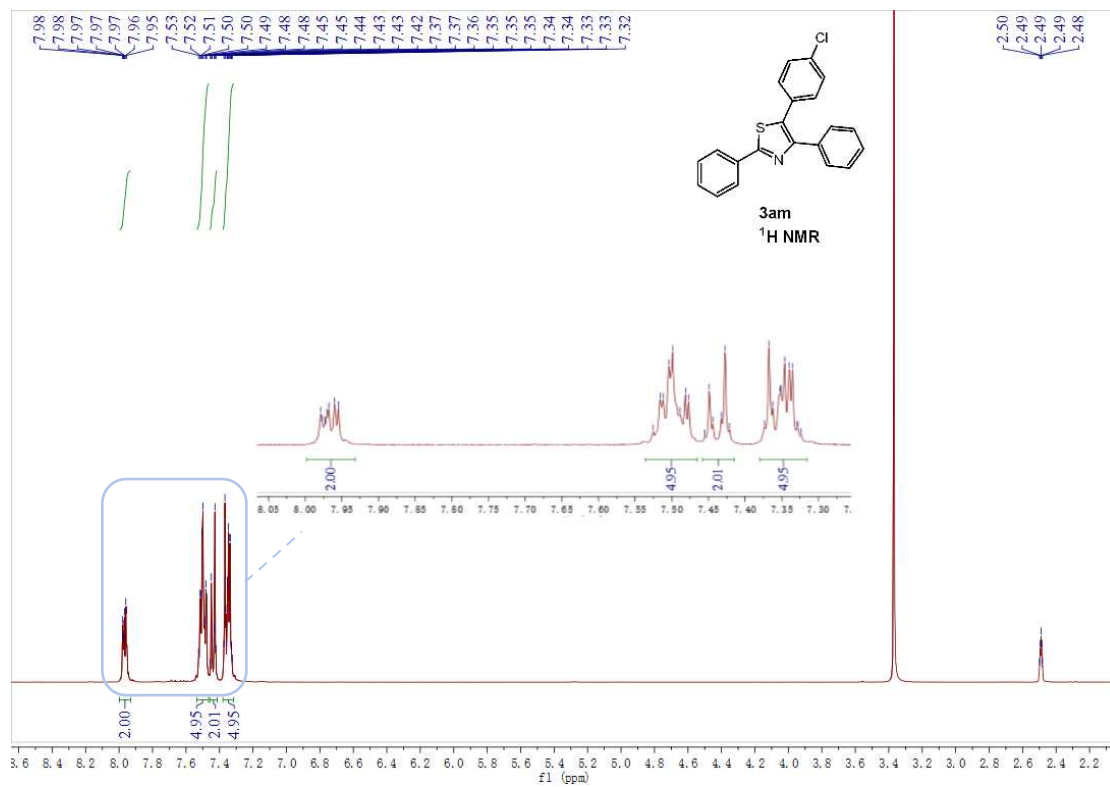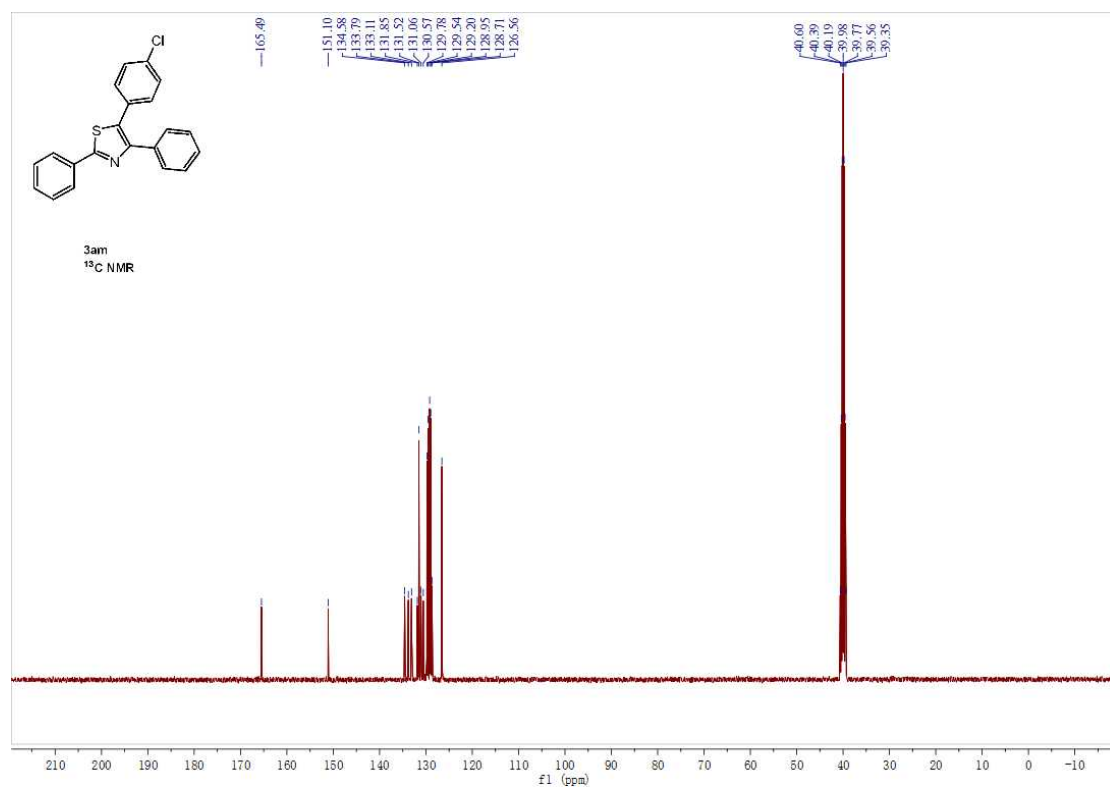

Supplement: d3ob00245d1.pdf [file d3ob00245d1.pdf]
